# Supplementary material for: Fluorescence enhancement via structural rigidification inside a self-assembled Pd4 molecular vessel
Source: Royal Society of Chemistry journal article supplement (doi:10.1039/d2cc04561c), 2022-01-01
Supplement: d2cc04561c1.pdf [file d2cc04561c1.pdf]

## Supporting Information

### Fluorescence enhancement via structural rigidification inside a self-assembled Pd<sub>4</sub> molecular vessel

Shakil Ahmed,<sup>a†</sup> Prodip Howlader,<sup>a†</sup> Soumalya Bhattacharyya,<sup>a</sup> Surajit Mondal,<sup>a</sup> Ennio Zangrando<sup>b</sup> and Partha Sarathi Mukherjee<sup>a\*</sup>

<sup>a</sup> Department of Inorganic and Physical Chemistry, Indian Institute of Science, Bangalore, 560012, India

<sup>b</sup> Department of Chemical and Pharmaceutical Sciences, University of Trieste, Trieste 34127, Italy

#### Experimental section:

##### Methods and materials:

Reagents used in this study were purchased from commercial sources and used without any purification. NMR studies were performed using a Bruker-make 400 MHz spectrometer and the chemical shifts ( $\delta$ ) in the spectra are reported in ppm relative to tetramethylsilane (Me<sub>4</sub>Si) as an internal standard (0.0 ppm) or proton resonance resulting from incomplete deuteration of the solvents CDCl<sub>3</sub> (7.26 ppm) and D<sub>2</sub>O (4.79 ppm). The guest **SG** was synthesized according to the reported procedure.<sup>1</sup>

##### Synthesis of the ligand **L**:

The ligand **L** was synthesized following reported procedure of terpyridine synthesis. Isophthalaldehyde (670 mg, 5 mmol) was taken into a flame dried 500 mL round bottom flask containing 50 mL of ethanol at 0 °C followed by addition of NaOH (400 mg, 10 mmol) with stirring. To this cold solution 3-acetyl pyridine (2.42 g, 20 mmol) in 10 mL of ethanol was added dropwise. Finally, 60 mL of ammonia solution was added followed by stirring at 0 °C for 1 h. The solution was then allowed to reach room temperature and refluxed at 80 °C for 12 h. The precipitate formed after refluxing was filtered and washed thoroughly with ethanol and water to get solid powder of **L** as pure product. Yield 1.50 g (56 %). <sup>1</sup>H NMR (400 MHz, CDCl<sub>3</sub>):  $\delta$  = 9.39 (s, 4H), 8.71-8.70 (d, 4H), 8.54-8.52 (d, 4H), 8.06-8.01 (s, 5H), 7.89-7.87 (d, 2H), 7.78-7.76 (d, 1H), 7.49-7.46 (d, 4H).

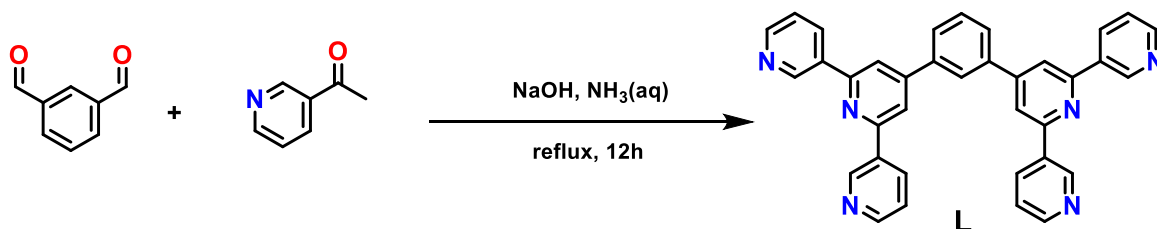

**Scheme S1:** Synthetic scheme for ligand **L**.

### Synthesis of the cage **MP1**:

*cis*-(en)Pd(NO<sub>3</sub>)<sub>2</sub> (**M1**) (6.9 mg, 0.024 mmol) was dissolved in 0.5 mL of H<sub>2</sub>O-CH<sub>3</sub>OH (7:3) mixture and the yellow clear solution was added to the solid ligand **L** (6.45 mg, 0.012 mmol) and heated at 60 °C with stirring for 12 h resulting in clear colourless solution. The clear solution was then subjected to acetone vapour diffusion and within a week formation of colourless hexagonal shaped crystals was observed. These single crystals were further used for SC-XRD analysis to determine the structure. Similar reaction was carried out in deuterated solvent for recording the <sup>1</sup>H NMR spectra. <sup>1</sup>H NMR (400 MHz, D<sub>2</sub>O-CD<sub>3</sub>OD): δ = 10.25 (s, 8H), 9.08-9.07 (d, 8H), 8.59-8.58 (d, 8H), 8.08 (s, 8H), 7.84-7.82 (d, 4H), 7.70-7.68 (t, 8H), 7.60-7.59 (d, 4H), 3.27-3.26 (m, 16H).

### Synthesis of the cage **MP2**:

*cis*-(dmen)Pd(NO<sub>3</sub>)<sub>2</sub> (**M2**) (7.6 mg, 0.024 mmol) was dissolved in 0.5 mL of H<sub>2</sub>O-CH<sub>3</sub>OH (1:1) mixture and the yellow clear solution was added to the solid ligand **L** (6.45 mg, 0.012 mmol) and heated at 60 °C with stirring for 12 h resulting in clear colourless solution. The clear solution was then treated with excess of KPF<sub>6</sub> to get white coloured precipitate. The white precipitate was then isolated and dissolved in acetonitrile followed by ESI-MS spectroscopy study. Similar reaction was carried out in deuterated solvent for recording 1D and 2D <sup>1</sup>H NMR spectra.

### Host-guest encapsulation with **MP1**:

Molecular pocket **MP1** was synthesized according to the above-mentioned procedure in deuterated solvent. Then different guests in excess amount were added to the clear solution of **MP1** in D<sub>2</sub>O:CD<sub>3</sub>OD mixture and the mixture was stirred for 12 h. The mixture was then centrifuged, and the excess solid was discarded to get a clear solution of the host-guest complex. All these solutions were characterized by <sup>1</sup>H NMR and <sup>1</sup>H DOSY and <sup>1</sup>H NOESY spectroscopy.

### Single crystal structure of **MP1**:

Single crystal X-ray data for **MP1** were collected on X-ray diffraction beamline XRD1 of the ELETTRA Synchrotron, Trieste (Italy), using the rotating crystal method with a monochromatic wavelength of 0.7000 Å, on a Dectris Pilatus 2M detector. Data collection was done at 100(2) K using a nitrogen stream cryo-cooler. Cell refinement, indexing and scaling of the data set were performed using the CCP4 package, and programs Denzo and Scalepack. The structure was solved by intrinsic phasing method with ShelXT<sup>1</sup> and refined by the full-matrix least-squares method based on *F*<sup>2</sup> with all observed reflections using the Olex2 program.<sup>2</sup> All non-hydrogen atoms were refined with anisotropic displacement coefficients. The hydrogen atoms bonded to carbon were included at geometric positions and given thermal parameters equivalent to 1.2xtimes those of the atom to which they were attached. In addition, the structure contains a huge void of disordered solvent molecules therefore, solvent mask incorporated in the program was applied to account for embedded solvent molecules.<sup>3</sup> Crystallographic data and refinement parameter are given in **Table S1**.

**Table S1:** Crystallographic data and refinement parameters of **MP1**

|                                             |                                                                                 |
|---------------------------------------------|---------------------------------------------------------------------------------|
| <i>empirical formula</i>                    | C <sub>86</sub> H <sub>92</sub> N <sub>28</sub> O <sub>27</sub> Pd <sub>4</sub> |
| <i>Fw</i>                                   | 2375.47                                                                         |
| <i>T /K</i>                                 | 100(2)                                                                          |
| <i>crystal system</i>                       | triclinic                                                                       |
| <i>space group</i>                          | <i>P</i> -1                                                                     |
| <i>a /Å</i>                                 | 16.423(3)                                                                       |
| <i>b /Å</i>                                 | 18.511(4)                                                                       |
| <i>c /Å</i>                                 | 22.079(4)                                                                       |
| <i>α /deg</i>                               | 83.12(3)                                                                        |
| <i>β /deg</i>                               | 71.77(3)                                                                        |
| <i>γ /deg</i>                               | 65.34(3)                                                                        |
| <i>V /Å<sup>3</sup></i>                     | 5793(3)                                                                         |
| <i>Z</i>                                    | 2                                                                               |
| <i>ρ<sub>calcd</sub> /g cm<sup>-3</sup></i> | 1.362                                                                           |
| <i>μ (Mo-Kα) /mm<sup>-1</sup></i>           | 0.663                                                                           |
| <i>λ /Å</i>                                 | 0.700                                                                           |
| <i>F(000)</i>                               | 2408.0                                                                          |
| <i>collected reflns</i>                     | 229558                                                                          |
| <i>unique reflns</i>                        | 37584                                                                           |
| <i>GOF on F<sup>2</sup></i>                 | 1.038                                                                           |
| <i>R<sub>1</sub><sup>a</sup></i>            | 0.0573                                                                          |
| <i>wR<sub>2</sub><sup>b</sup></i>           | 0.1528                                                                          |
| <i>CCDC No.</i>                             | 2179640                                                                         |

---

<sup>a</sup> $R_1 = \sum |F_o| - |F_c| / \sum |F_o|$ , <sup>b</sup> $wR_2 = [\sum \{w(F_o^2 - F_c^2)^2\} / \sum \{w(F_o^2)^2\}]^{1/2}$ .

### Computational studies:

Full geometry optimization of **SGCMP1** (Figure S25) was carried out by semi-empirical method with PM6 basis set using the Gaussian 09 package. Finally, single-point energy of the host-guest complex was calculated using the hybrid B3LYP functional with a mixed basis set of LanL2DZ (for Pd atom) and 631g (for C, H, and N atoms).

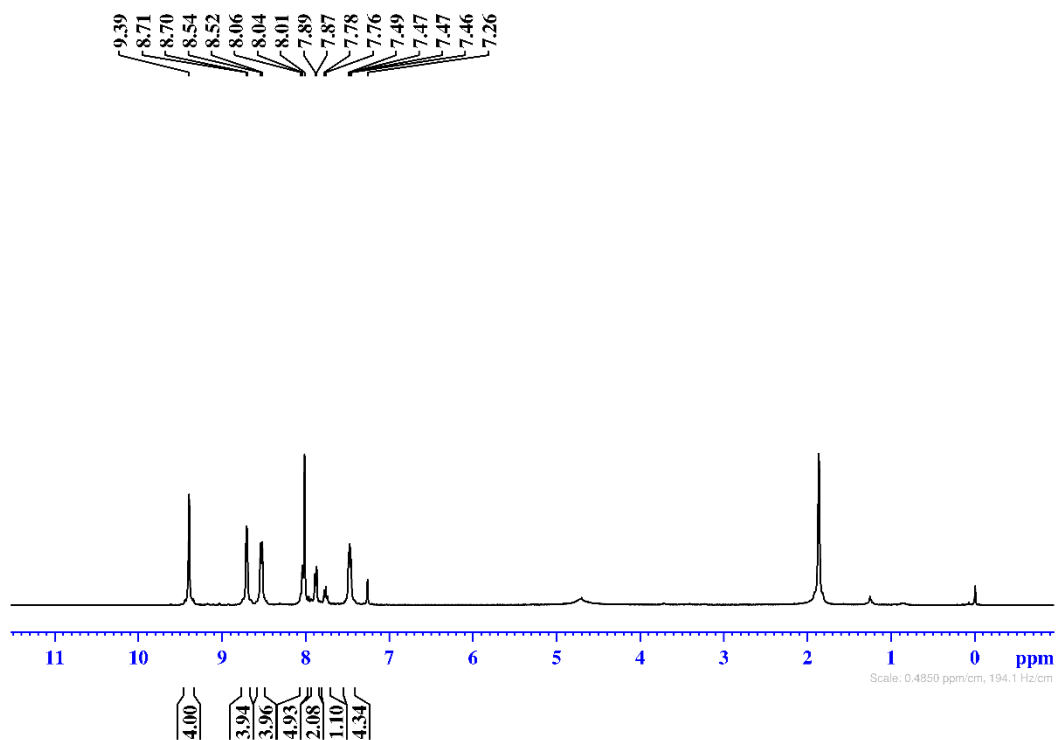

**Fig. S1:**  $^1\text{H}$  NMR spectrum of the ligand **L** in  $\text{CDCl}_3$ .

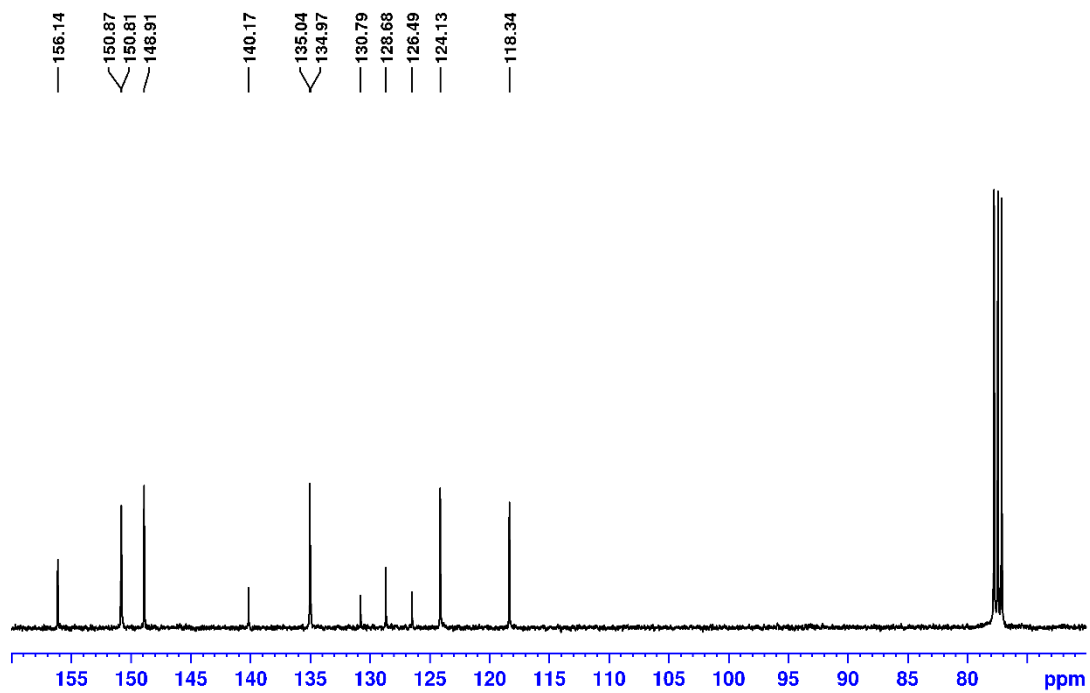

**Fig. S2:**  $^{13}\text{C}$  NMR spectrum of the ligand **L** in  $\text{CDCl}_3$ .

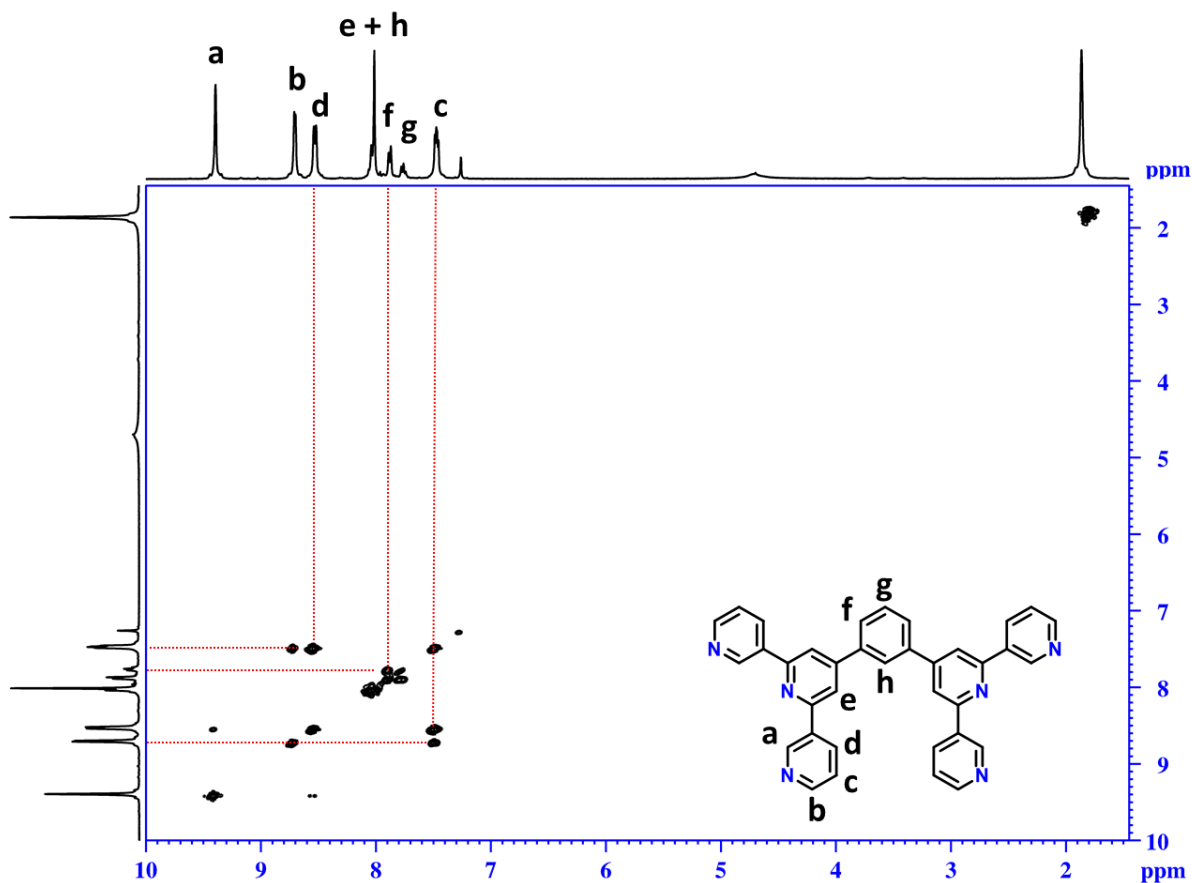

Fig. S3:  $^1\text{H}$ - $^1\text{H}$  COSY NMR of the ligand **L** in  $\text{CDCl}_3$ .

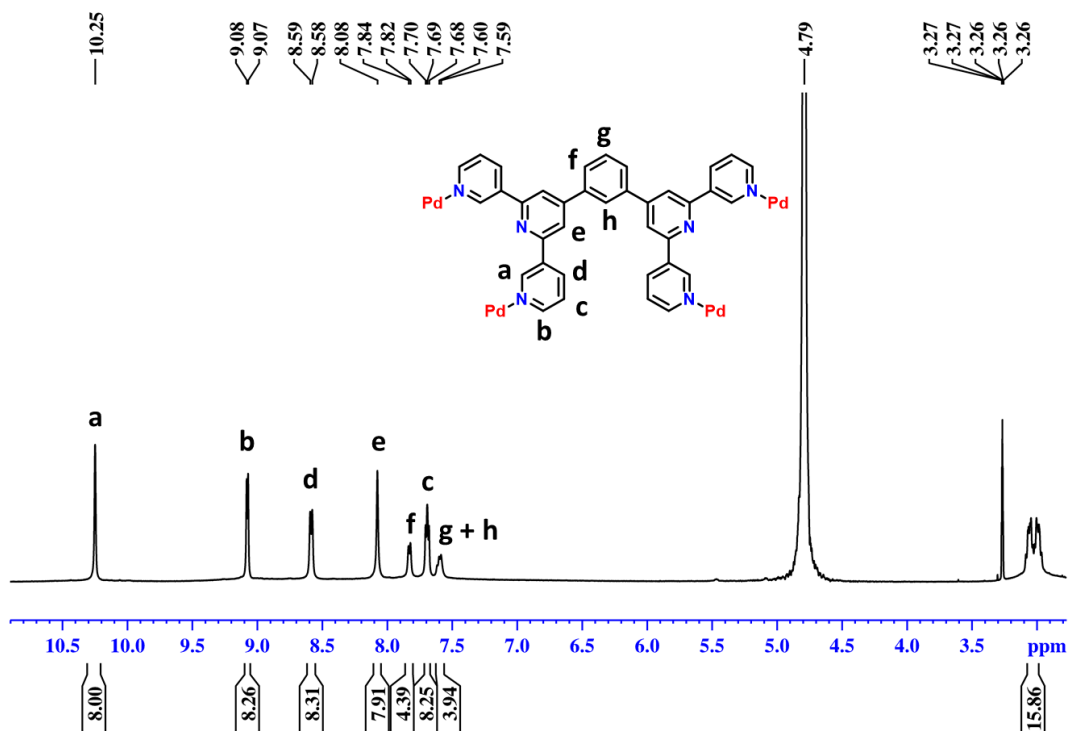

Fig. S4:  $^1\text{H}$  NMR spectrum of **MP1** in  $\text{D}_2\text{O}$ - $\text{CD}_3\text{OD}$  (7:3) mixture.

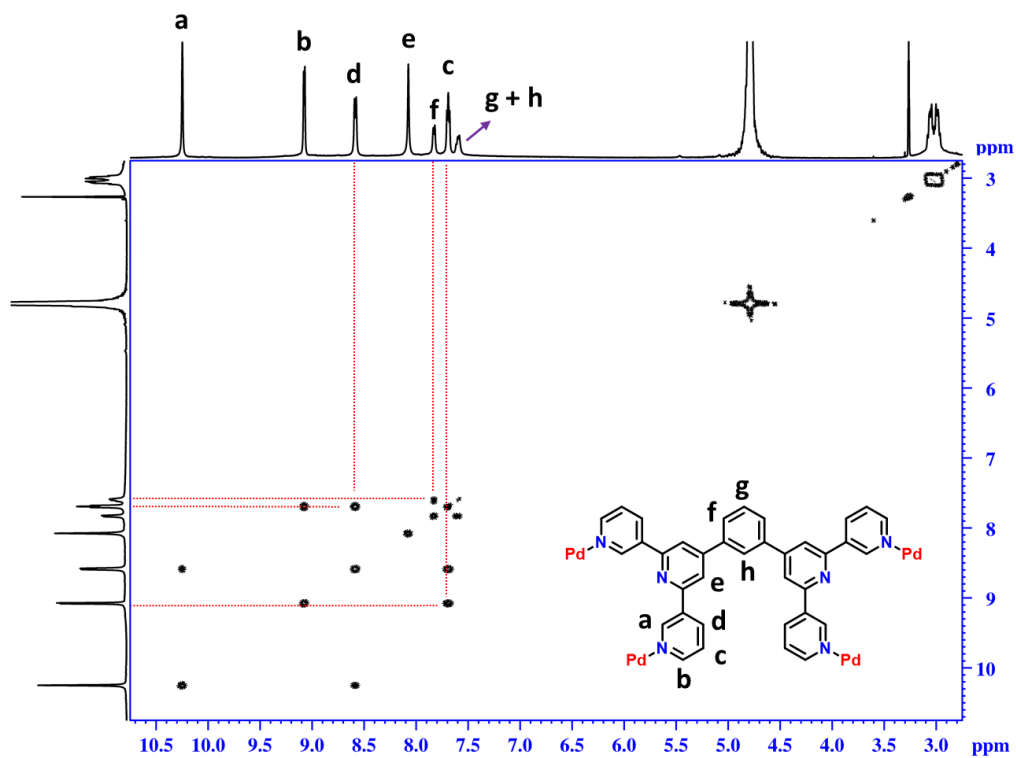

**Fig. S5:**  $^1\text{H}$ - $^1\text{H}$  COSY NMR of MP1 in  $\text{D}_2\text{O}$ - $\text{CD}_3\text{OD}$  (7:3) mixture.

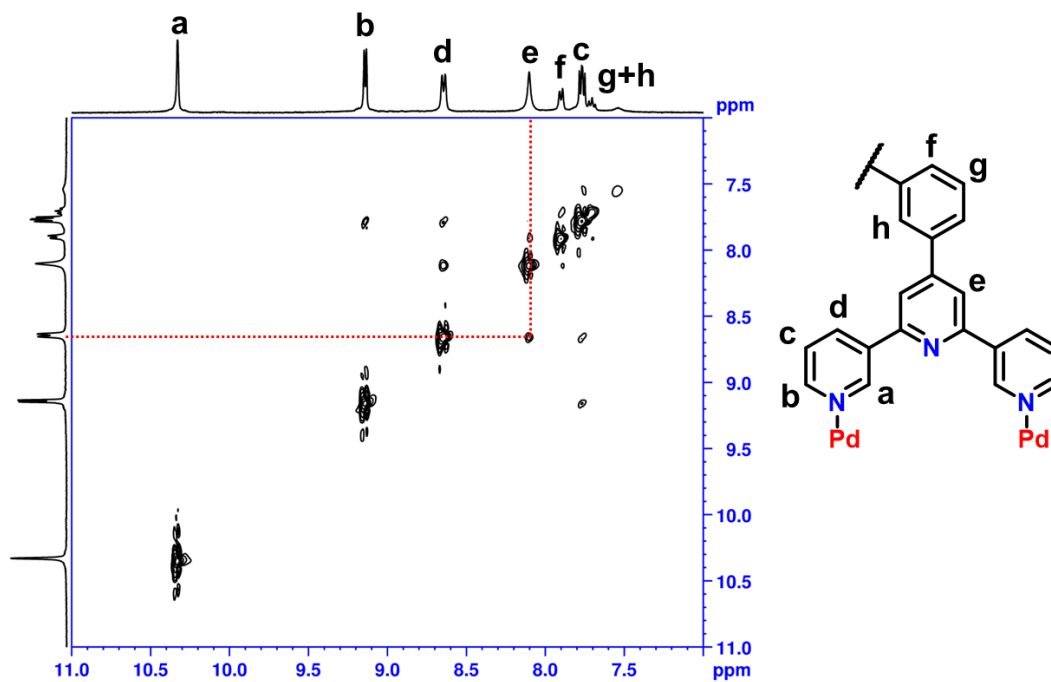

**Fig. S6:**  $^1\text{H}$ - $^1\text{H}$  NOESY NMR of the MP1 in  $\text{D}_2\text{O}$ - $\text{CD}_3\text{OD}$  (7:3) mixture.

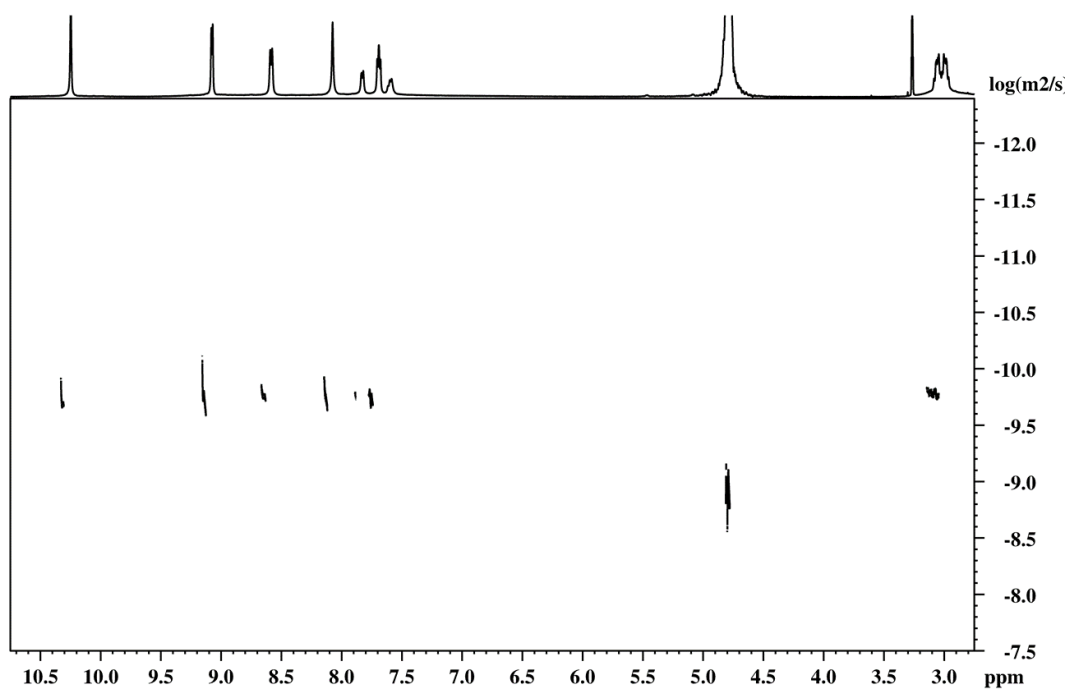

**Fig. S7:**  $^1\text{H}$  DOSY NMR spectrum of the **MP1** in  $\text{D}_2\text{O}$ - $\text{CD}_3\text{OD}$  (7:3) mixture.

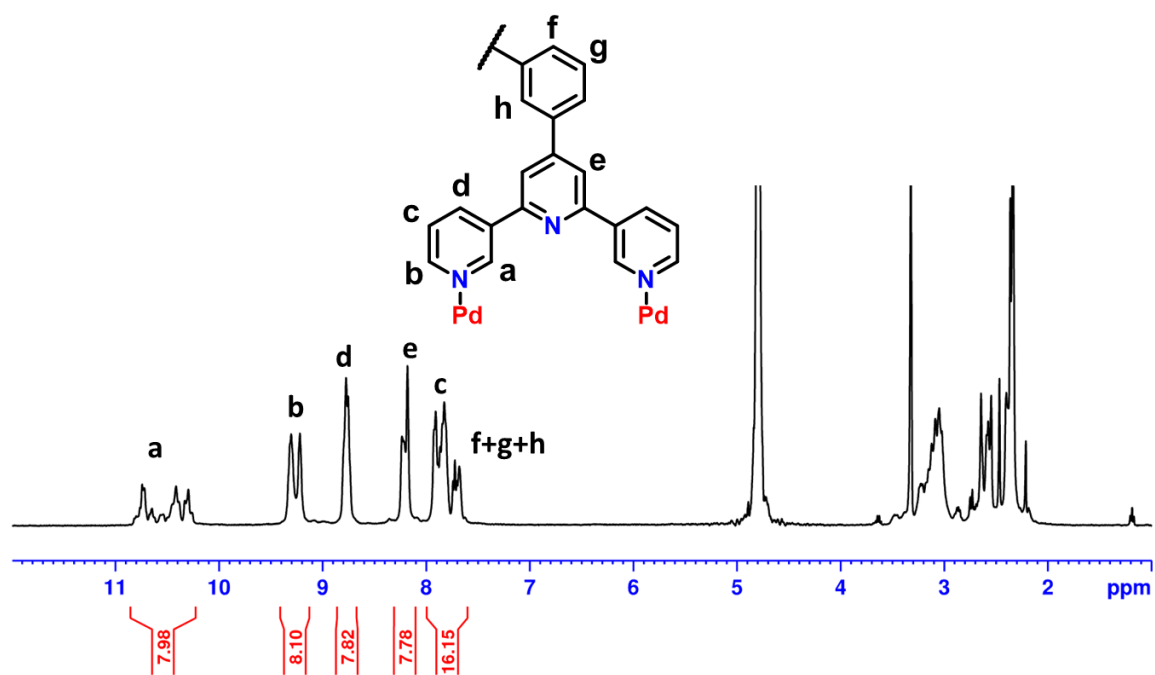

**Fig. S8:**  $^1\text{H}$  NMR spectrum of **MP2** in  $\text{D}_2\text{O}$ - $\text{CD}_3\text{OD}$  (1:1) mixture.

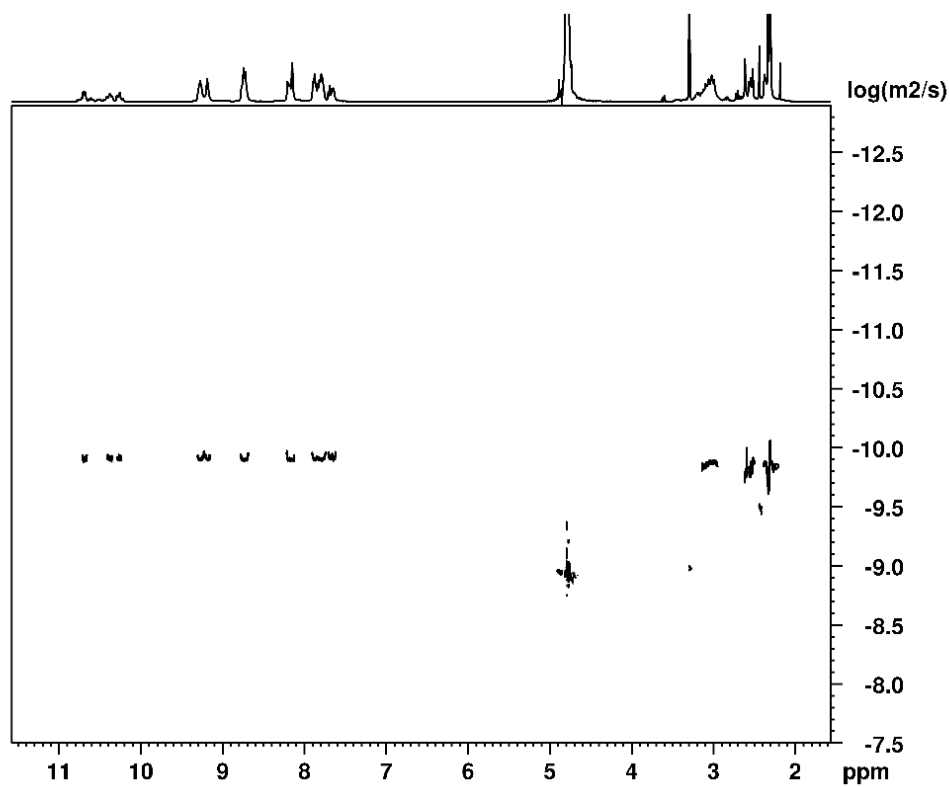

**Fig. S9:**  $^1\text{H}$  DOSY NMR of **MP2** in  $\text{D}_2\text{O}-\text{CD}_3\text{OD}$  (1:1) mixture.

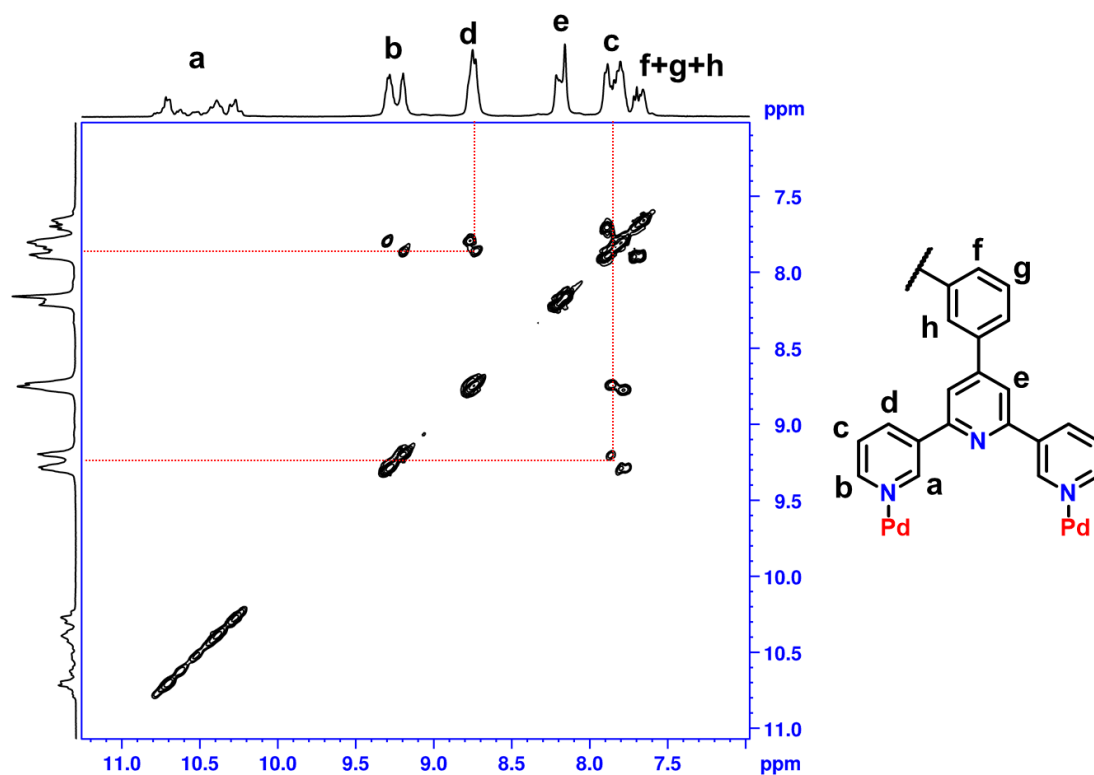

**Fig. S10:**  $^1\text{H}-^1\text{H}$  COSY NMR spectra of the **MP2** in  $\text{D}_2\text{O}-\text{CD}_3\text{OD}$  (1:1) mixture.



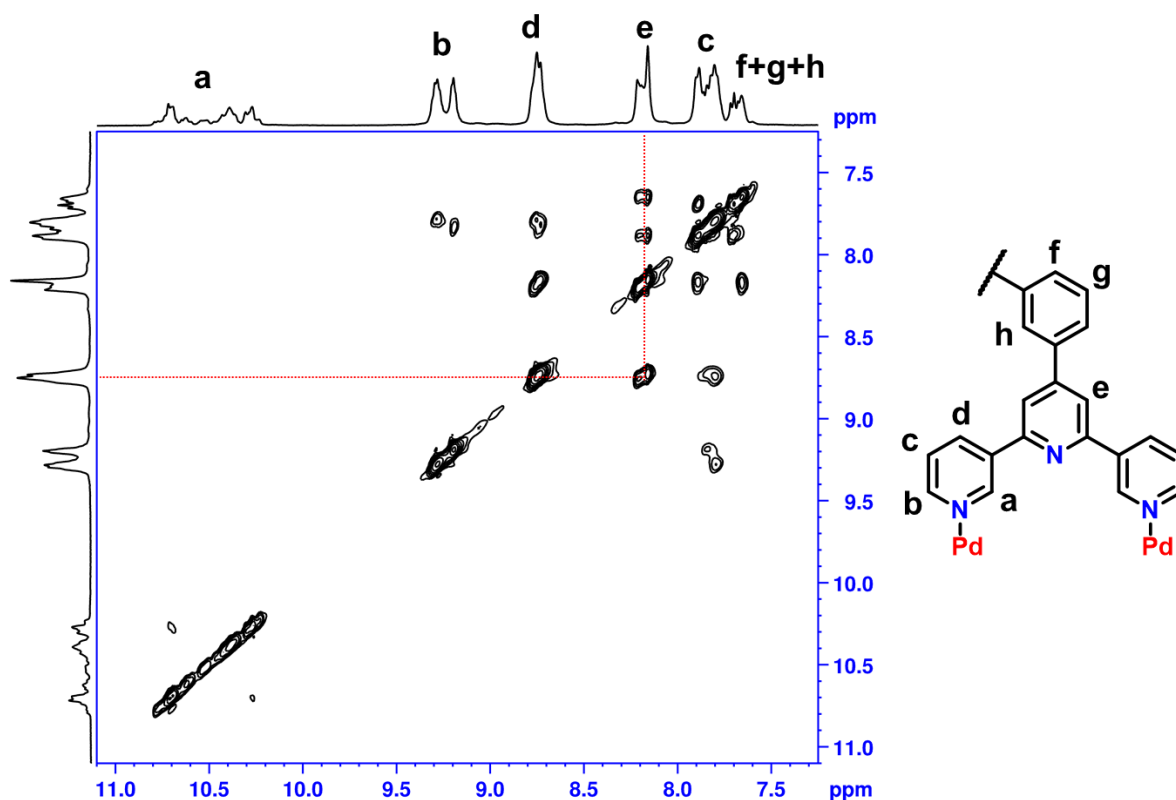

**Fig. S11:**  $^1\text{H}$ - $^1\text{H}$  NOESY NMR spectrum of MP2 in  $\text{D}_2\text{O}$ - $\text{CD}_3\text{OD}$  (1:1) mixture.

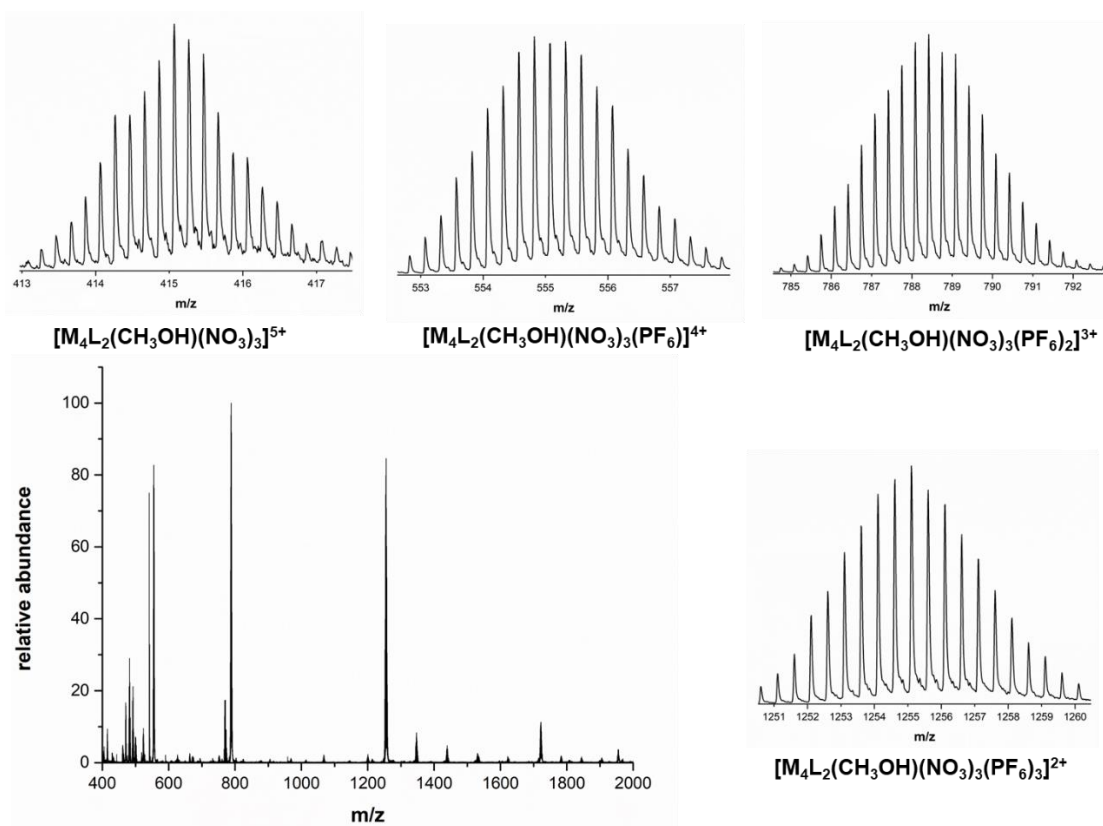

**Fig. S12:** ESI-MS spectrum of  $\text{PF}_6^-$  analogue salt of MP2 in acetonitrile containing 5% of methanol.

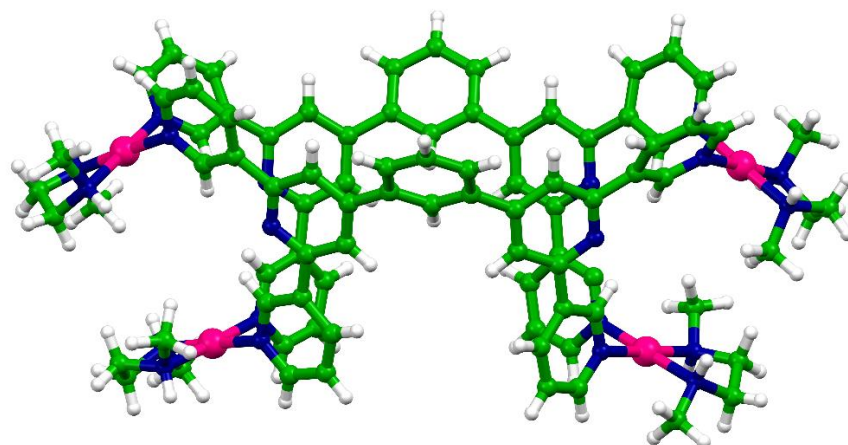

**Fig. S13:** Energy optimized geometry of **MP2**. Color codes: Pd pink; N blue; C green; H white.

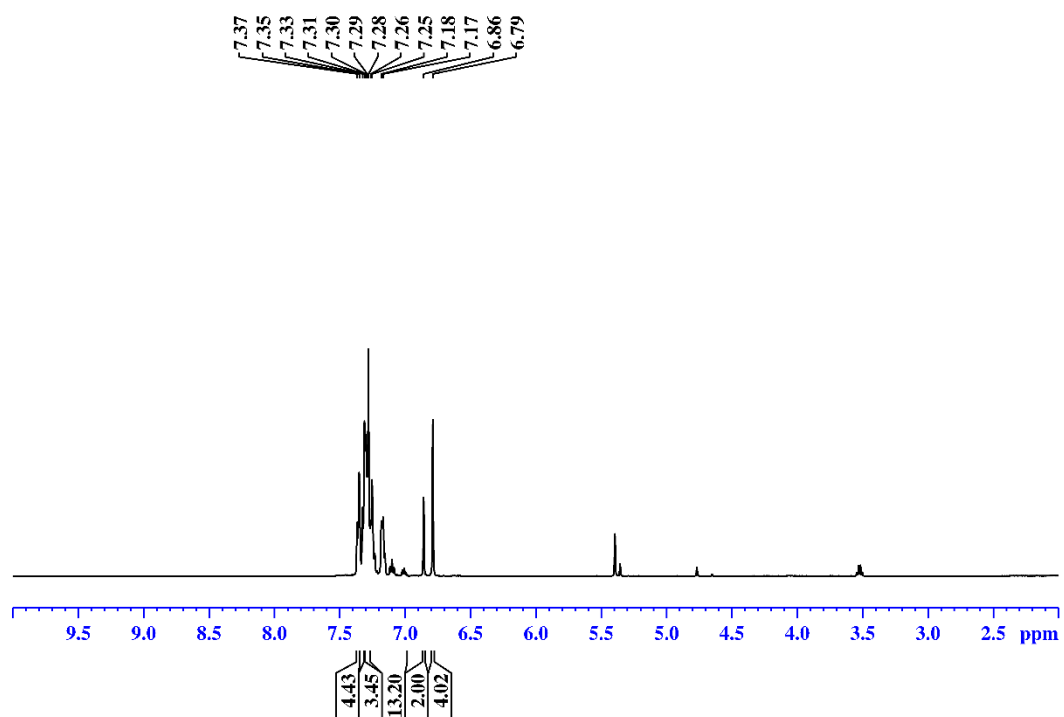

**Fig. S14:** <sup>1</sup>H NMR spectrum of **SG** in CDCl<sub>3</sub>.

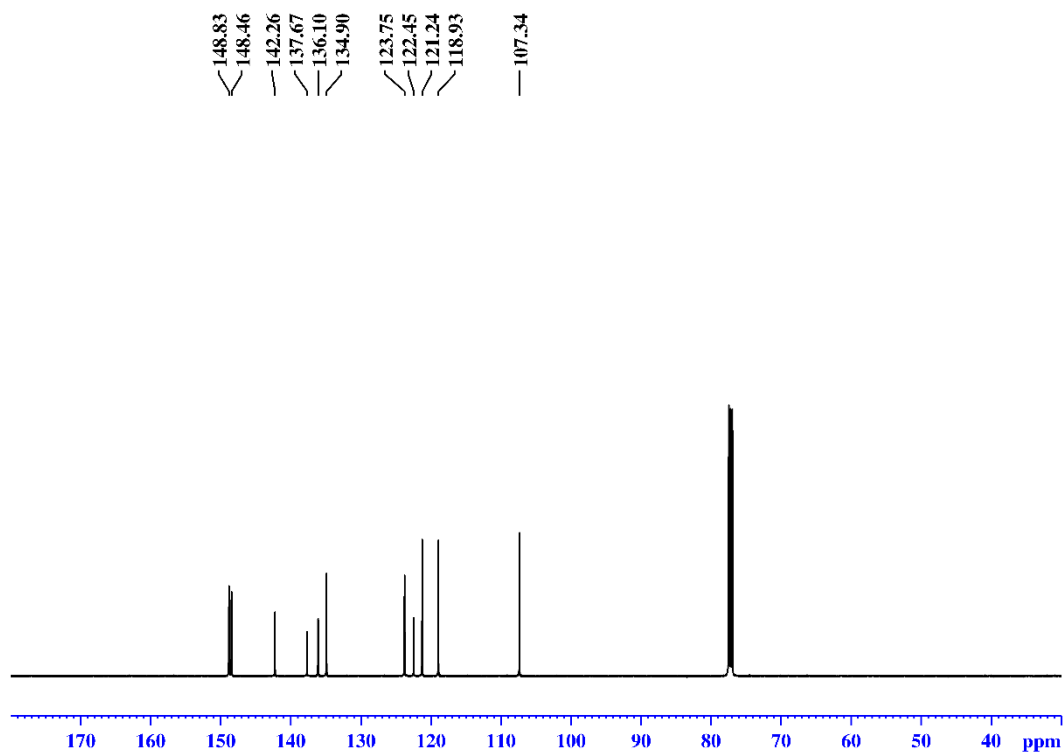

**Fig. S15:**  $^{13}\text{C}$  NMR spectrum **SG** in  $\text{CDCl}_3$ .

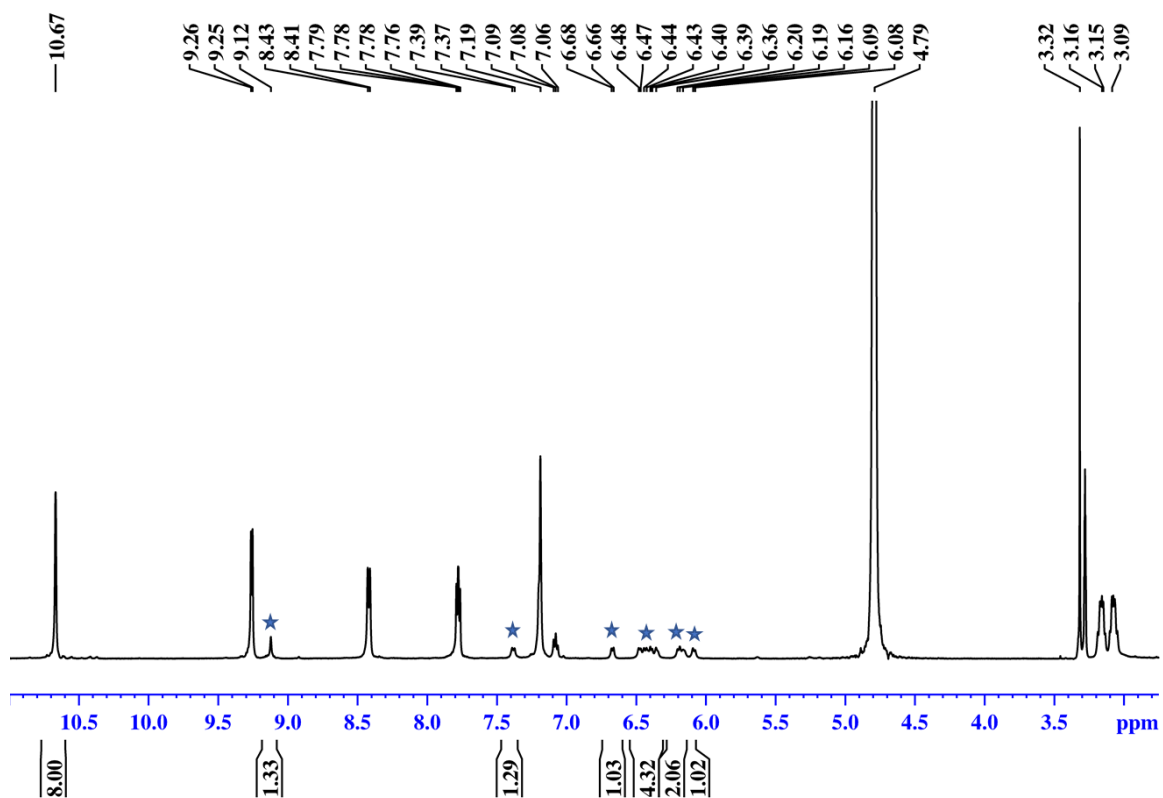

**Fig. S16:**  $^1\text{H}$  NMR spectrum of 1-pyrenealdehyde encapsulated **MP1** in  $\text{D}_2\text{O}-\text{CD}_3\text{OD}$  (7:3) mixture. 1-pyrenealdehyde peaks are denoted by  $\star$  shape.

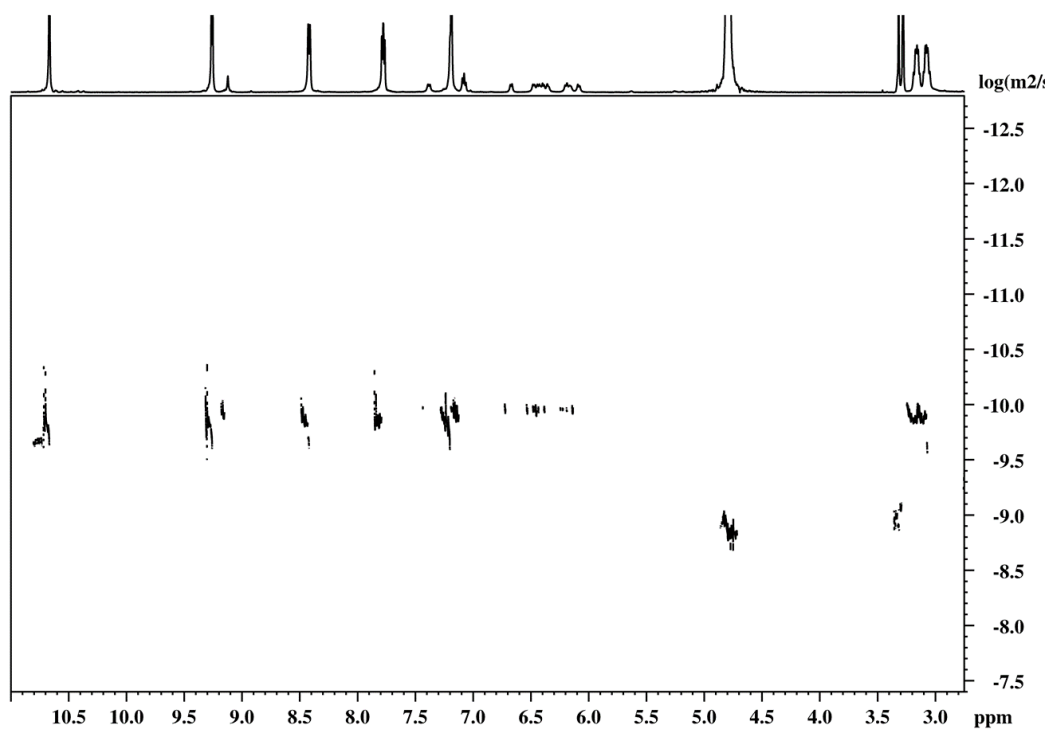

**Fig. S17:** <sup>1</sup>H DOSY NMR spectrum of 1-pyrenealdehyde encapsulated **MP1** in D<sub>2</sub>O-CD<sub>3</sub>OD (7:3) mixture.

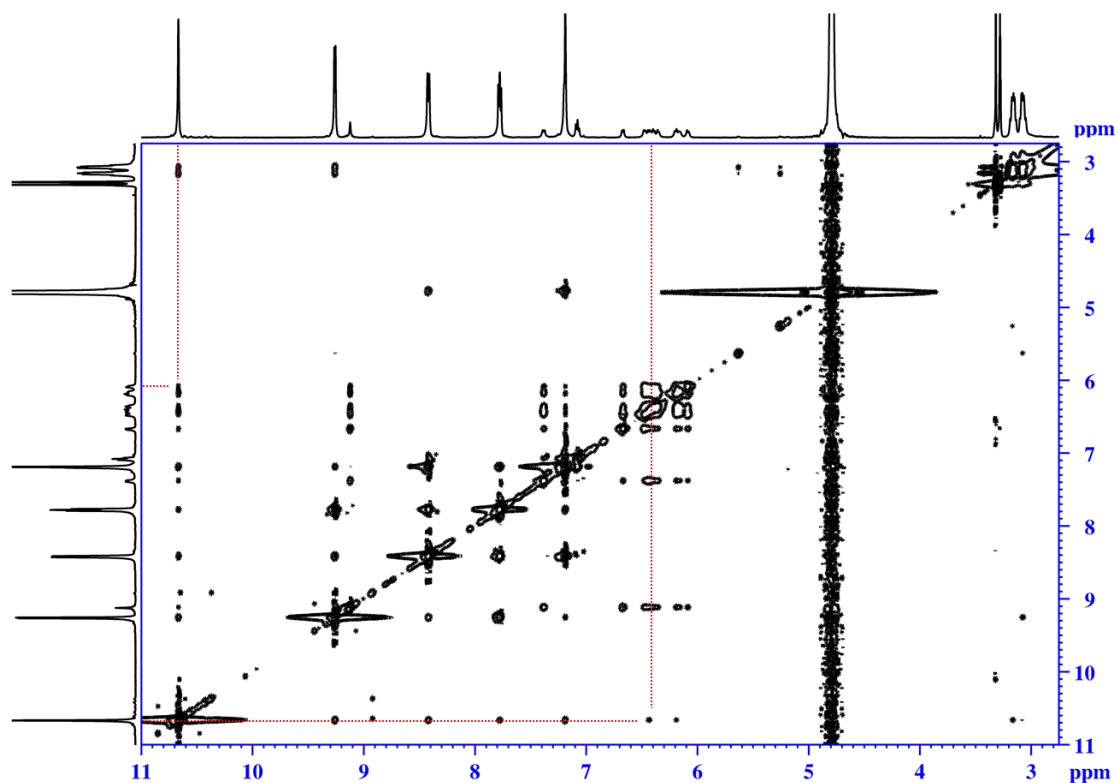

**Fig. S18:** <sup>1</sup>H-<sup>1</sup>H NOESY NMR of 1-pyrenealdehyde encapsulated **MP1** in D<sub>2</sub>O-CD<sub>3</sub>OD (7:3) mixture.

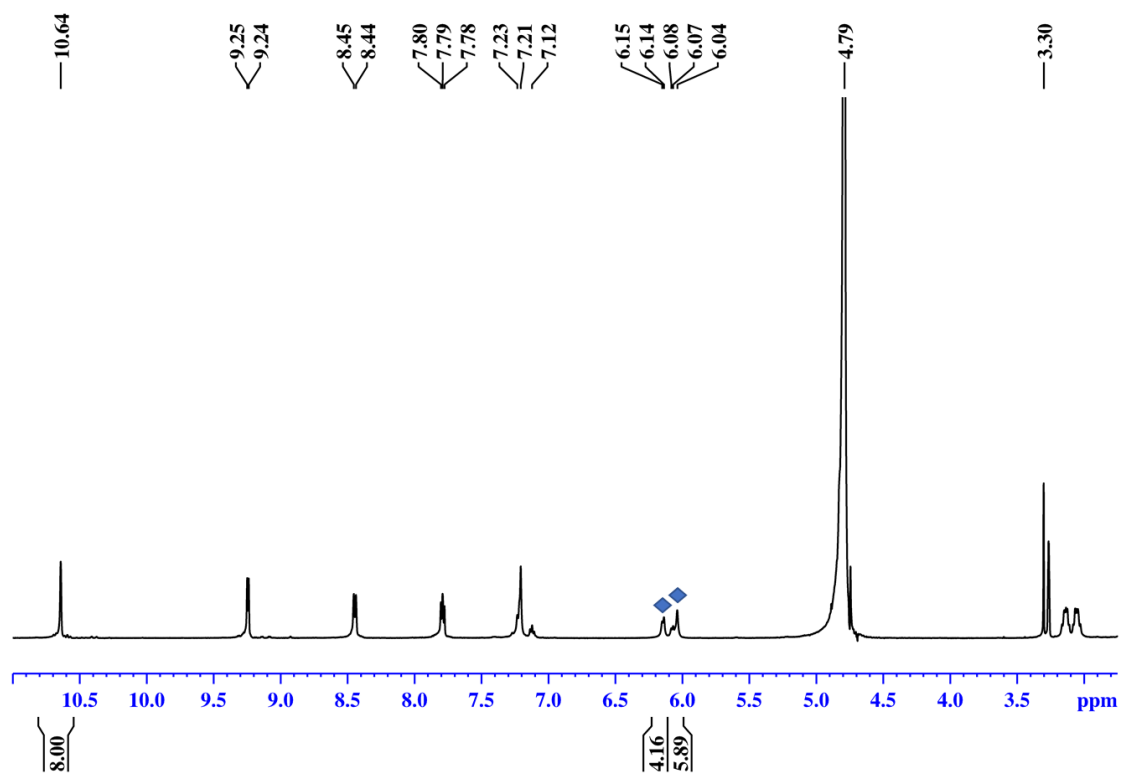

**Fig. S19:**  $^1\text{H}$  NMR spectrum of pyrene encapsulated **MP1** in  $\text{D}_2\text{O}$ - $\text{CD}_3\text{OD}$  (7:3) mixture. Pyrene proton peaks are denoted by ♦ shape.

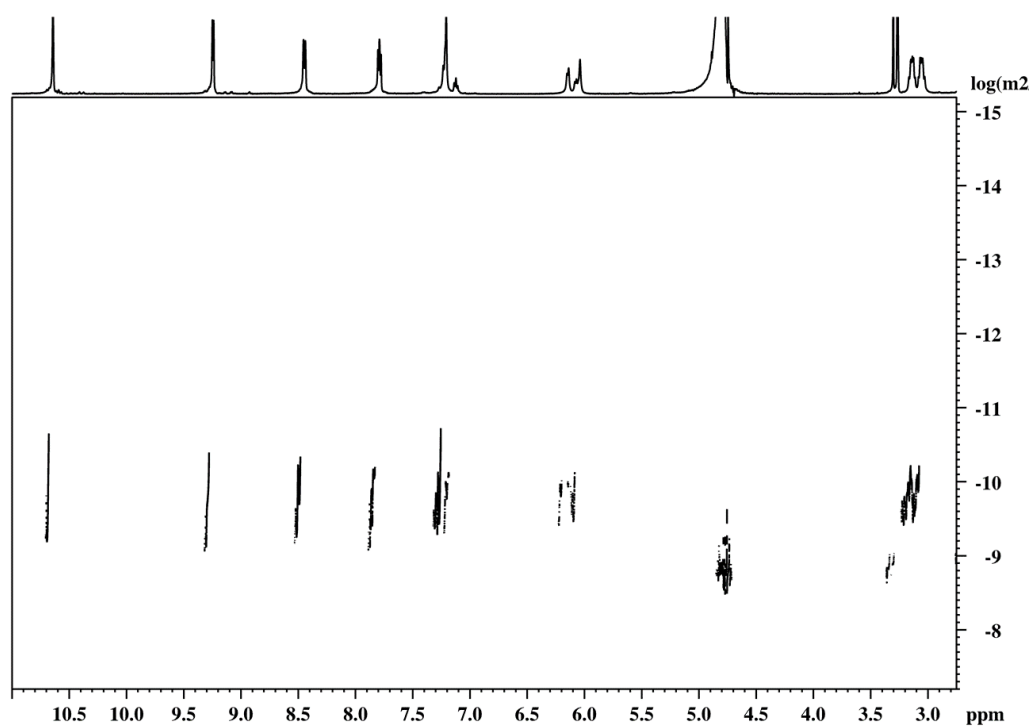

**Fig. S20:**  $^1\text{H}$  DOSY NMR of pyrene encapsulated **MP1** in  $\text{D}_2\text{O}$ - $\text{CD}_3\text{OD}$  (7:3) mixture.

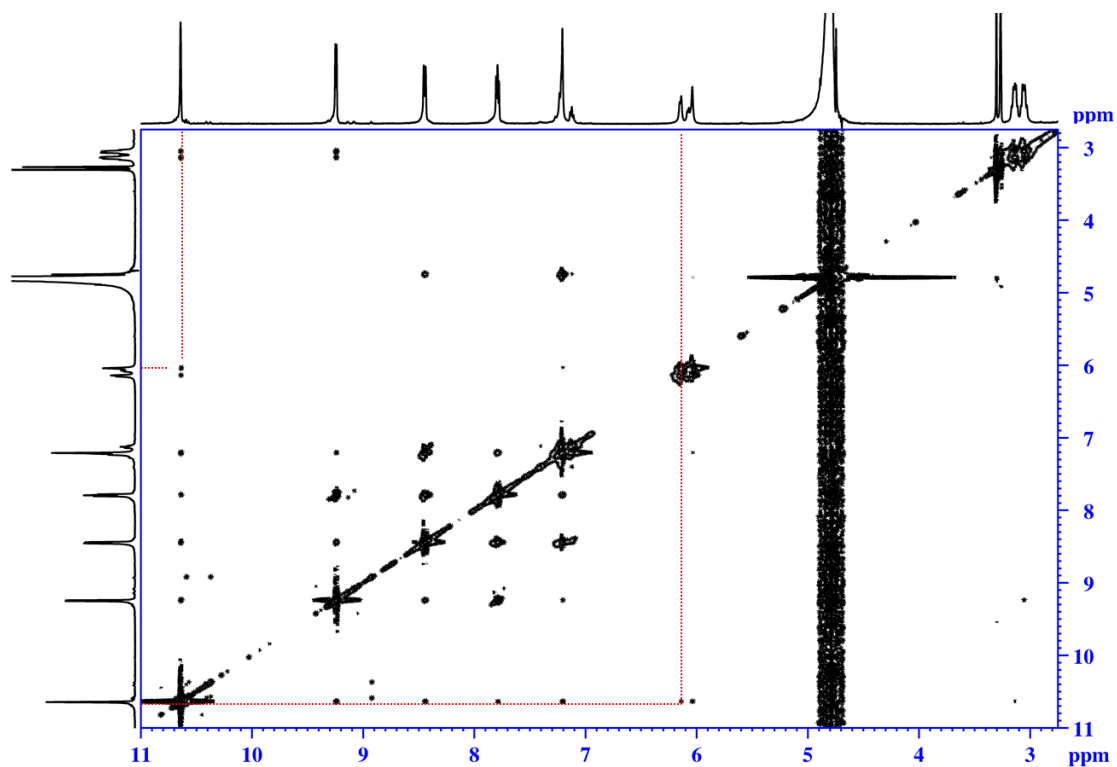

**Fig. S21:** <sup>1</sup>H-<sup>1</sup>H NOESY NMR of pyrene encapsulated **MP1** in D<sub>2</sub>O-CD<sub>3</sub>OD (7:3) mixture.

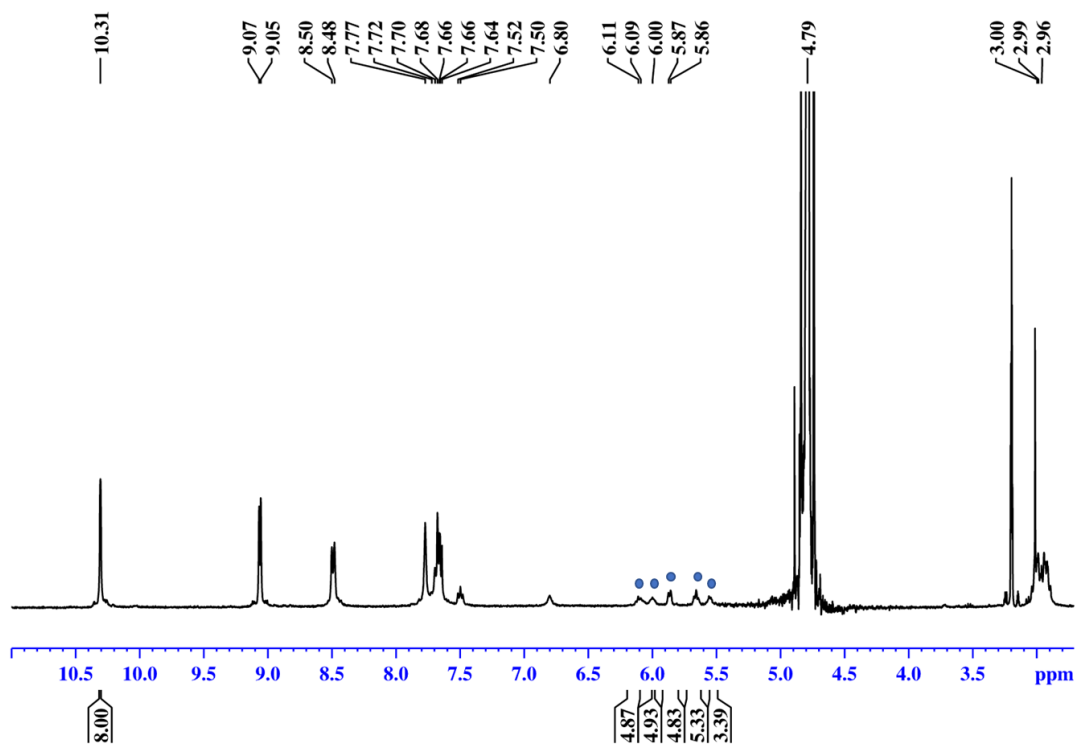

**Fig. S22:** <sup>1</sup>H NMR spectrum of **SG** encapsulated **MP1** in D<sub>2</sub>O-CD<sub>3</sub>OD (7:3) mixture. Proton peaks of **SG** are denoted by ● shape.

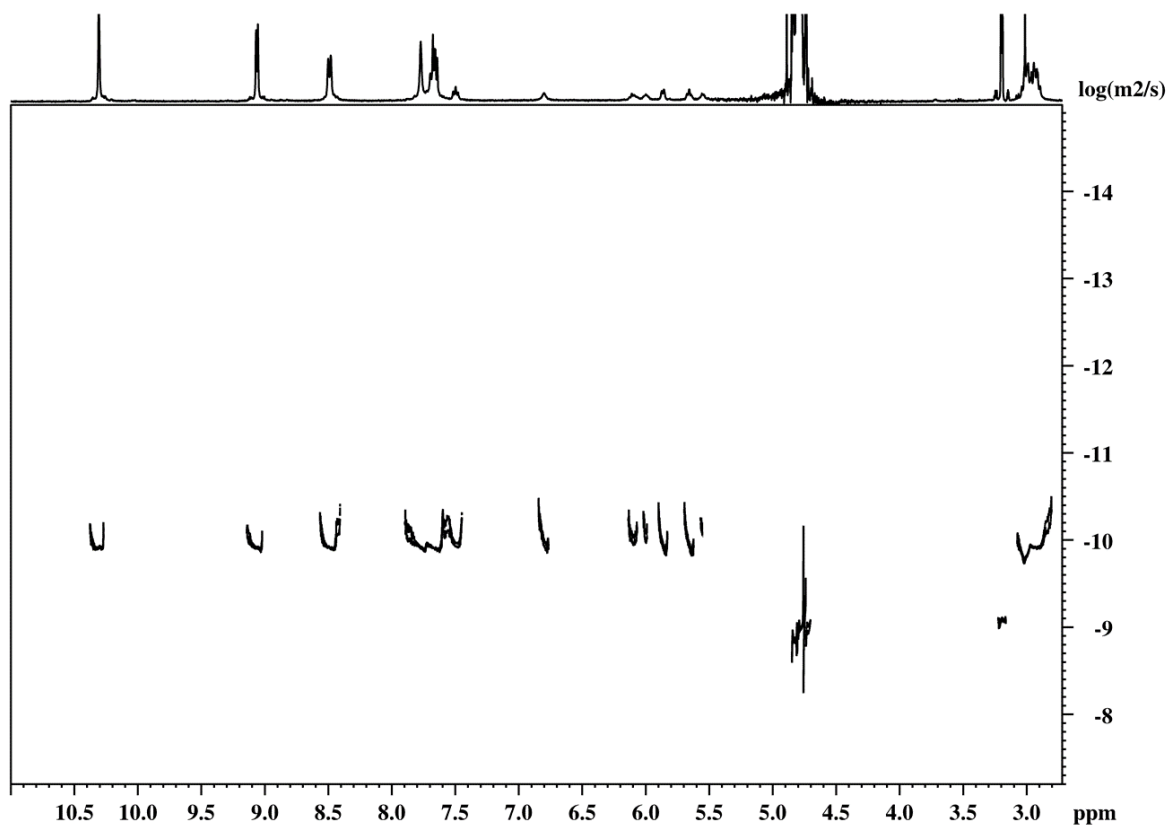

**Fig. S23:**  $^1\text{H}$  DOSY NMR spectrum of **SG** encapsulated **MP1** in  $\text{D}_2\text{O}$ - $\text{CD}_3\text{OD}$  (7:3) mixture.

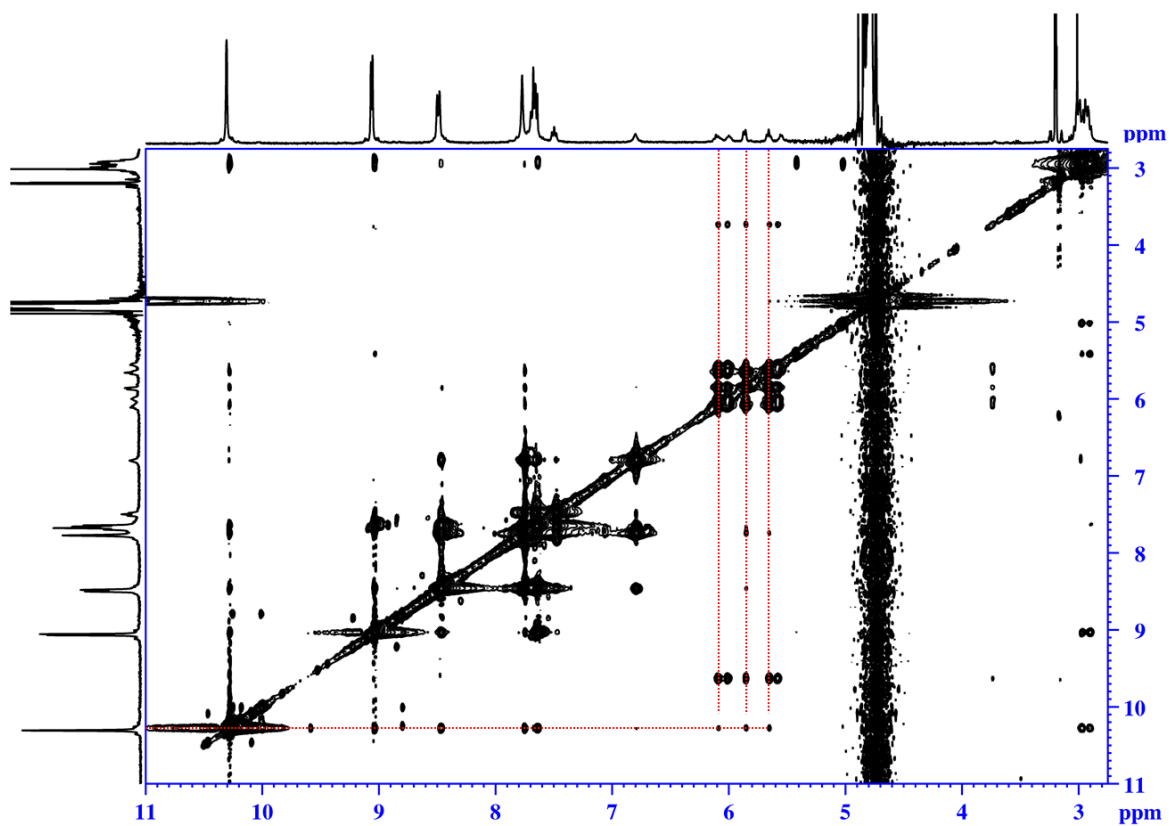

**Fig. S24:**  $^1\text{H}$ - $^1\text{H}$  NOESY NMR spectrum of **SG** encapsulated **MP1** in  $\text{D}_2\text{O}$ - $\text{CD}_3\text{OD}$  (7:3) mixture.

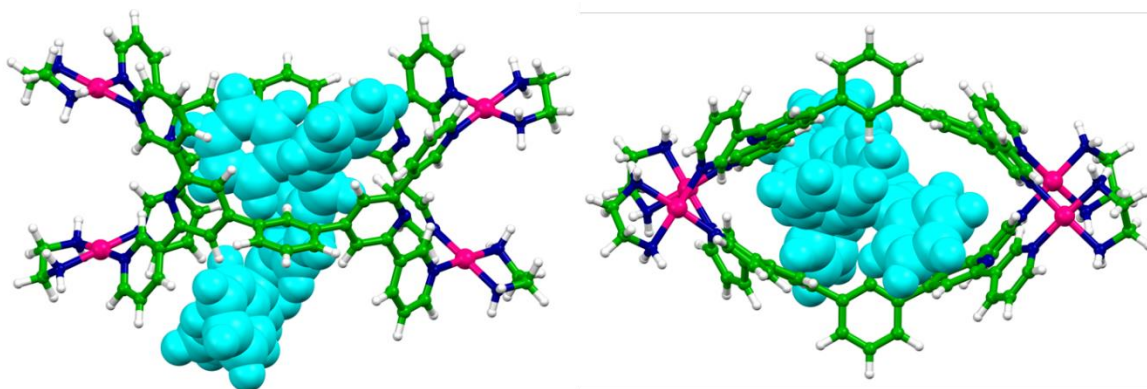

**Fig. S25:** Energy optimized geometry of **SG-MP1**. (a) side view, and (b) top view. Color codes: Pd pink; N blue; C green; H white and the guest molecule as light blue.

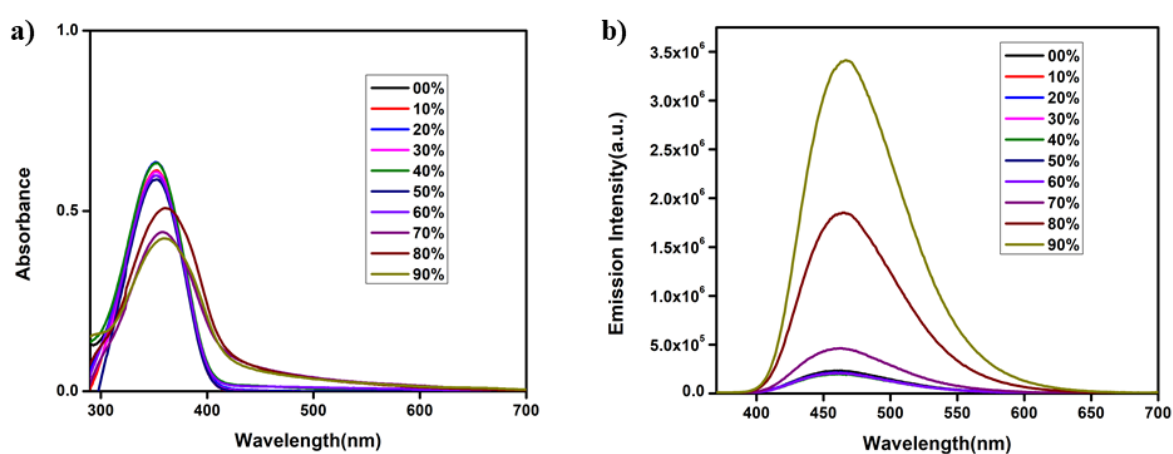

**Fig. S26:** a) UV-Vis spectra; b) Fluorescence emission spectra of **SG** corresponding to different water fractions in THF ( $[\text{SG}] = 1.7 \times 10^{-6} \text{ M}$ ).

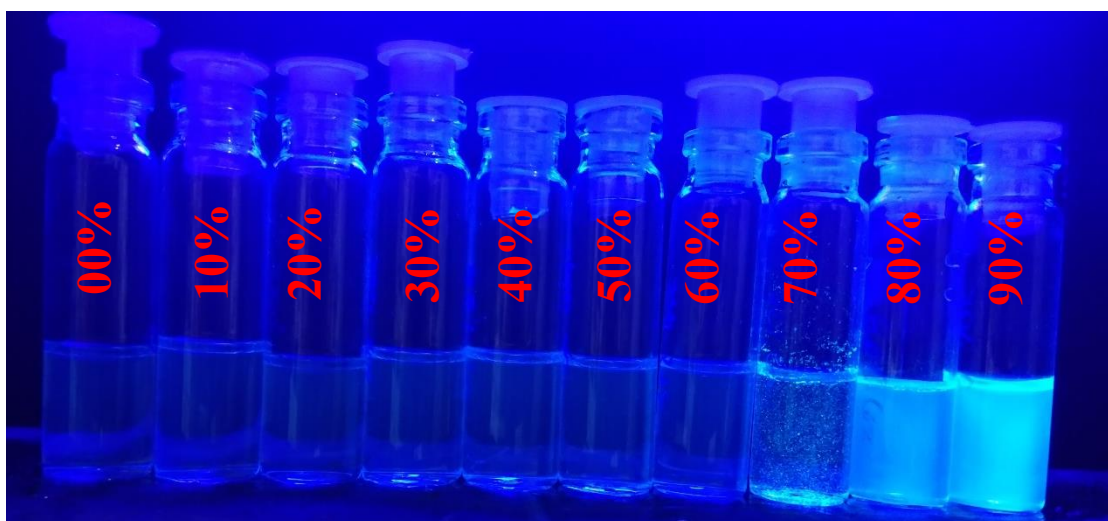

**Fig. S27:** Photograph of **SG** corresponding to different water fractions in THF under the UV irradiation of 365 nm.



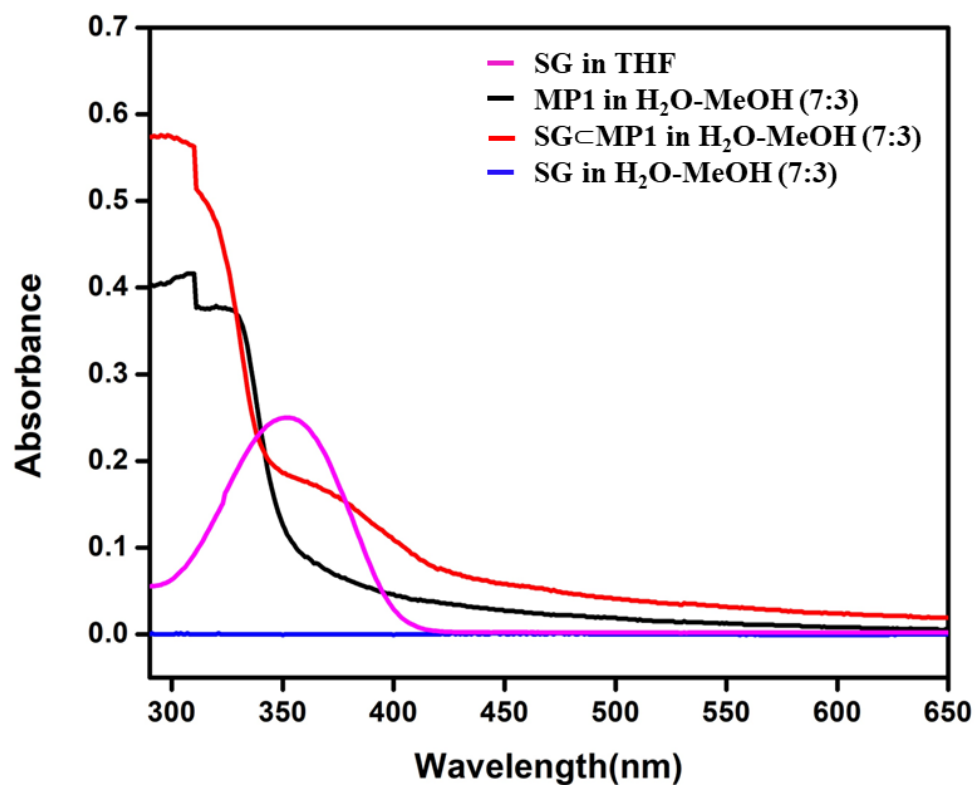

**Fig. S28:** UV-Vis spectra of **SG** in THF, **SG** in H<sub>2</sub>O-MeOH (7:3), **MP1** in H<sub>2</sub>O-MeOH (7:3), and **SG⊂MP1** in H<sub>2</sub>O-MeOH (7:3) mixture.

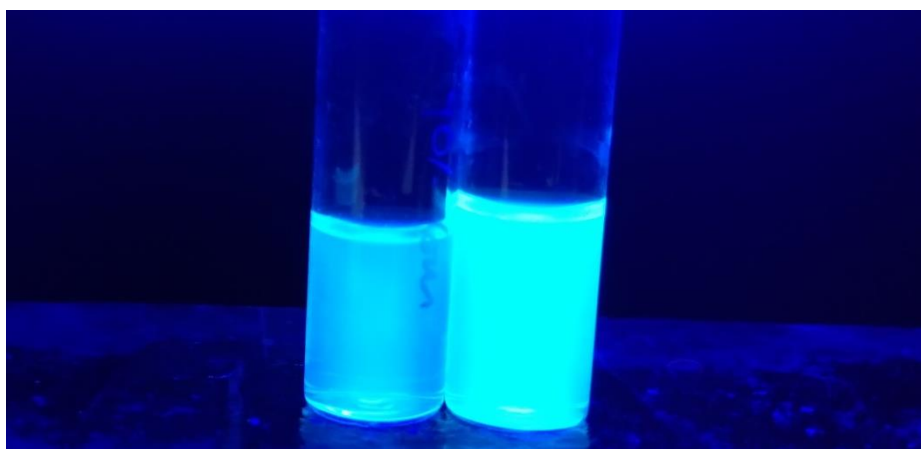

**Fig. S29:** Photograph of **SG** corresponding to its aggregated state in THF-water (1:9) (left) and **SG⊂MP1** in H<sub>2</sub>O-MeOH (7:3) mixture (right) under the UV light of 365 nm.

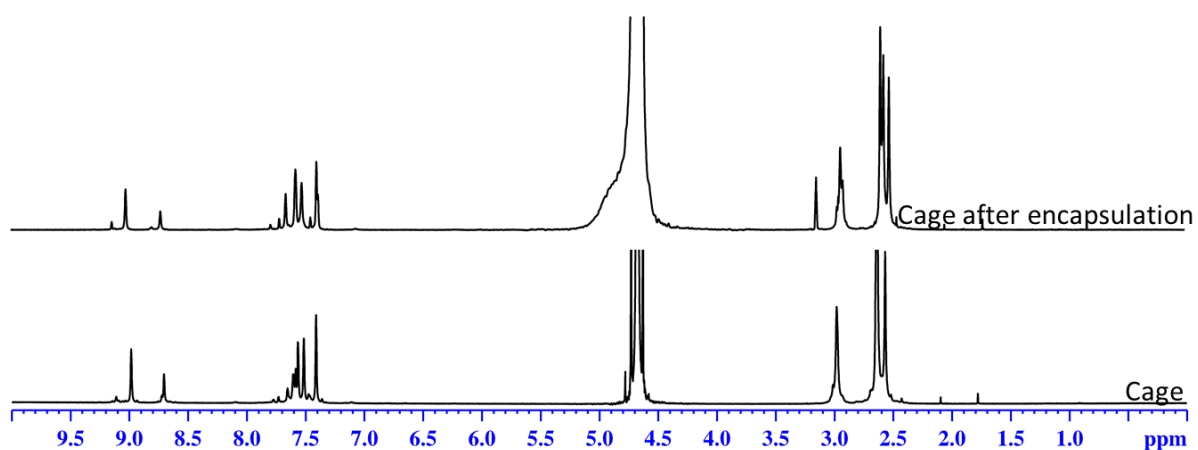

**Fig. S30:** Encapsulation study of the AIE active guest **SG** inside the nano-cavity of a molecular barrel<sup>6</sup>  $[M_6L_4]^{12+}$ , <sup>1</sup>H NMR of the barrel (bottom), and after the treatment of **SG** (top) in D<sub>2</sub>O-CD<sub>3</sub>OD (7:3) mixture.

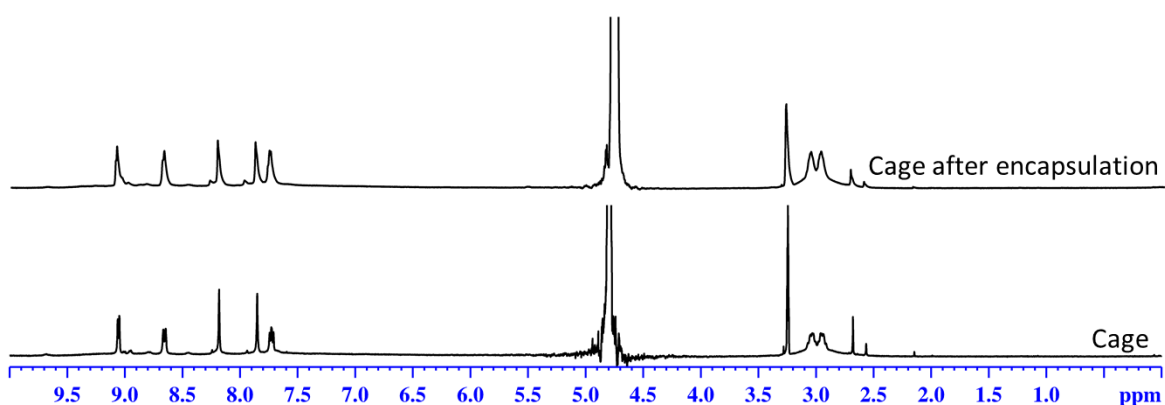

**Fig. S31:** Encapsulation study of the AIE active guest **SG** inside the nano-cavity of a trifacial molecular barrel<sup>7</sup>  $[M_6L_3]^{12+}$ , <sup>1</sup>H NMR of the barrel (bottom), and after the treatment of **SG** (top) in D<sub>2</sub>O-CD<sub>3</sub>OD (7:3) mixture.

**Table S2:** Absolute Fluorescence Quantum Yields of Compounds Under Different Conditions.

| Systems                                                               | Quantum Yields |
|-----------------------------------------------------------------------|----------------|
| <b>SG</b> in THF                                                      | 2.59%          |
| <b>SG</b> in 90% H <sub>2</sub> O-THF mixture                         | 48.02%         |
| <b>SG</b> $\subset$ <b>MP1</b> in H <sub>2</sub> O-MeOH (7:3) mixture | 53.98%         |

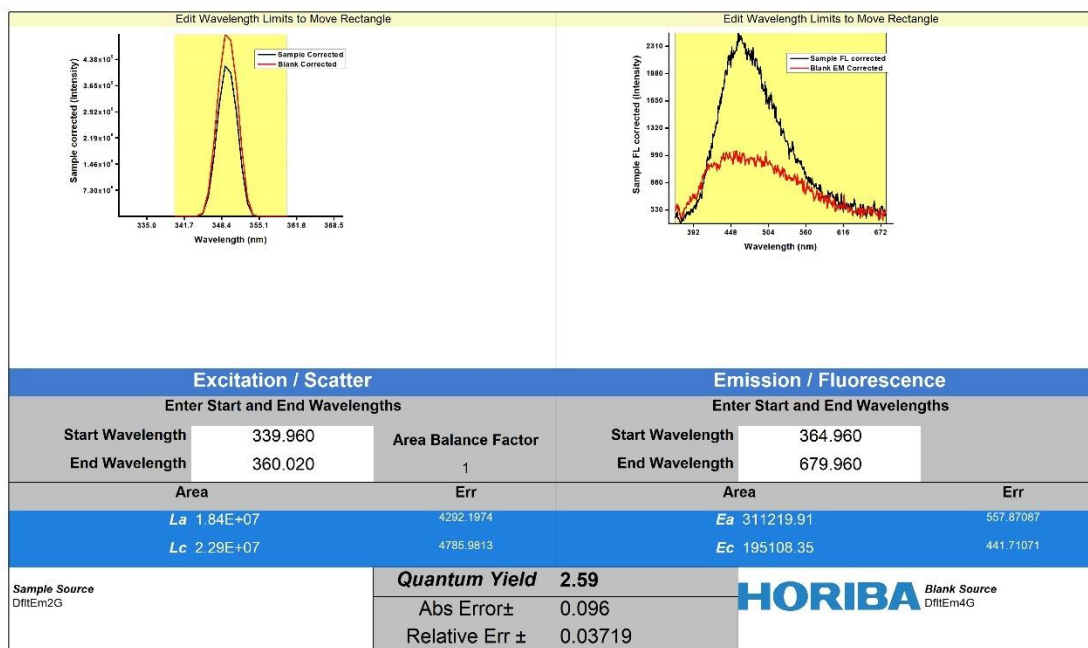

**Fig. S32:** Absolute fluorescence quantum yields of the SG  $\{[SG] = 1.7 \times 10^{-6} \text{ M}\}$  in THF (excitation/emission slit width: 2/2).

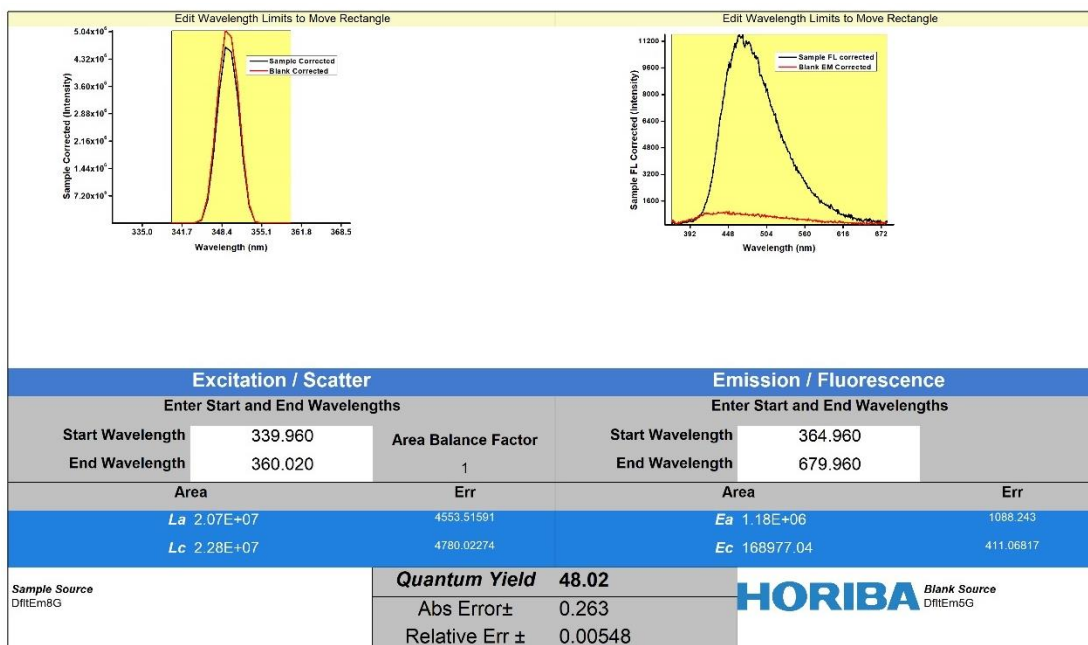

**Fig. S33:** Absolute fluorescence quantum yields of the SG  $\{[SG] = 1.7 \times 10^{-6} \text{ M}\}$  in 90% H<sub>2</sub>O-THF mixture (excitation/emission slit width: 2/2).

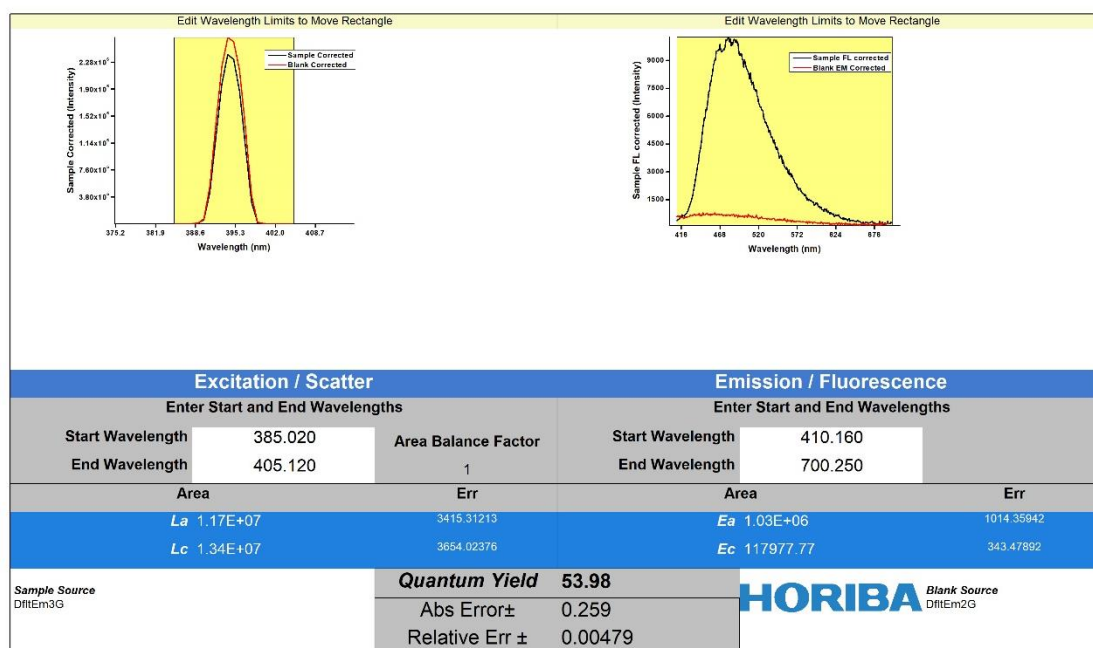

**Fig. S34:** Absolute fluorescence quantum yields of the **SG-MP1** in H<sub>2</sub>O-MeOH (7:3) mixture {[**SG**] = 1.7 × 10<sup>-6</sup> M} (excitation/emission slit width: 2/2).

#### References:

- 1) S. Ma, J. Zhang, J. Qian, J. Chen, B. Xu and W. Tian, Efficient Spontaneous and Stimulated Emission from 1,4-Bis(2,2-Diphenylvinyl)Benzene Single Crystals with Cross-Dipole Stacking. *Adv. Opt. Mater.* 2015, **3** (6), 763–768.
- 2) G. M. Sheldrick, *Acta Cryst.* 2008, **A64**, 112.
- 3) O. V. Dolomanov, L. J. Bourhis, R. J. Gildea, J. A. K. Howard and H. Puschmann, *J. Appl. Crystallogr.* 2009, **42**, 339-341.
- 4) A. Spek, *Acta Crystallogr. C* 2015, **71**, 9.
- 5) M. Frisch, G. Trucks, H. B. Schlegel, G. E. Scuseria, M. A. Robb, J. R. Cheeseman, G. Scalmani, V. Barone, B. Mennucci and G. Petersson, *Inc., Wallingford, CT* 2009, **200**.
- 6) D. Samanta, S. Mukherjee, Y. P. Patil and P. S. Mukherjee, Self-Assembled Pd<sub>6</sub> Open Cage with Triimidazole Walls and the Use of Its Confined Nanospace for Catalytic Knoevenagel- and Diels–Alder Reactions in Aqueous Medium. *Chem. – A Eur. J.* 2012, **18**, 12322–12329.
- 7) P. Howlader, S. Ahmed, S. Mondal, E. Zangrando and P. S. Mukherjee, Conformation-Selective Self-Assembly of Pd<sub>6</sub>Trifacial Molecular Barrels Using a Tetrapyrrolyl Ligand. *Inorg. Chem.* 2022, **61**, 8121–8125.

Computed geometry for **SGCMP1**:

244

symmetry c1

|    |               |              |              |
|----|---------------|--------------|--------------|
| Pd | -8.807457000  | -4.056785000 | 0.073799000  |
| Pd | -7.854265000  | 4.095823000  | -0.267008000 |
| Pd | 8.086843000   | -5.045242000 | -0.226610000 |
| Pd | 8.061667000   | 3.233591000  | 0.124436000  |
| N  | -7.406004000  | -3.763720000 | 1.568581000  |
| N  | -7.338094000  | -3.933068000 | -1.375471000 |
| N  | -6.495597000  | 3.678285000  | 1.228518000  |
| N  | -6.488675000  | 3.498433000  | -1.698565000 |
| N  | 6.412353000   | -4.780443000 | 0.957920000  |
| N  | 7.032515000   | -4.427869000 | -1.904217000 |
| N  | 6.994008000   | 2.619705000  | 1.796189000  |
| N  | 6.342106000   | 3.000312000  | -0.983335000 |
| N  | -5.277138000  | -0.170501000 | 2.650634000  |
| N  | 4.980392000   | -1.146436000 | 2.592268000  |
| N  | -5.212534000  | -0.469415000 | -2.749474000 |
| N  | 5.011064000   | -0.639198000 | -2.661343000 |
| N  | -10.365128000 | -4.266594000 | 1.511408000  |
| H  | -10.301554000 | -5.153907000 | 2.032043000  |
| H  | -10.409715000 | -3.527002000 | 2.223939000  |
| N  | -10.299983000 | -4.409385000 | -1.397496000 |
| H  | -10.651640000 | -3.542267000 | -1.825825000 |
| H  | -10.033980000 | -5.018845000 | -2.182657000 |
| N  | -9.279090000  | 4.795109000  | 1.152447000  |
| H  | -9.451280000  | 4.168941000  | 1.949405000  |
| H  | -9.011631000  | 5.702446000  | 1.561404000  |
| N  | -9.291912000  | 4.586598000  | -1.754246000 |
| H  | -8.933124000  | 5.032287000  | -2.609255000 |
| H  | -9.832066000  | 3.770497000  | -2.072266000 |
| N  | 9.184834000   | -5.748091000 | 1.447747000  |
| H  | 9.534820000   | -4.989111000 | 2.047988000  |
| H  | 8.677793000   | -6.388732000 | 2.073203000  |

|   |              |              |              |
|---|--------------|--------------|--------------|
| N | 9.853270000  | -5.393718000 | -1.365720000 |
| H | 9.788514000  | -6.235405000 | -1.957424000 |
| H | 10.131243000 | -4.629735000 | -1.994915000 |
| N | 9.864484000  | 3.506701000  | 1.218205000  |
| H | 9.781822000  | 3.878133000  | 2.173852000  |
| H | 10.407373000 | 2.636618000  | 1.305654000  |
| N | 9.122063000  | 3.973577000  | -1.555982000 |
| H | 9.043694000  | 3.409966000  | -2.411823000 |
| H | 8.806459000  | 4.920667000  | -1.812377000 |
| C | -7.293189000 | -4.812349000 | 2.440290000  |
| H | -7.895715000 | -5.711595000 | 2.226066000  |
| C | -6.445500000 | -4.762416000 | 3.553475000  |
| H | -6.407531000 | -5.605990000 | 4.259924000  |
| C | -5.653452000 | -3.629341000 | 3.757834000  |
| H | -5.001827000 | -3.576777000 | 4.640963000  |
| C | -5.706312000 | -2.567626000 | 2.835366000  |
| C | -7.155717000 | -5.091551000 | -2.080797000 |
| H | -7.753790000 | -5.967205000 | -1.772454000 |
| C | -6.246490000 | -5.175776000 | -3.141951000 |
| H | -6.149448000 | -6.110219000 | -3.716787000 |
| C | -5.467728000 | -4.060558000 | -3.463803000 |
| H | -4.769151000 | -4.116921000 | -4.310393000 |
| C | -5.594562000 | -2.879851000 | -2.708472000 |
| C | -6.572102000 | -2.848297000 | -1.688335000 |
| H | -6.753394000 | -1.925978000 | -1.118160000 |
| C | -5.995409000 | 2.448177000  | 1.541370000  |
| H | -6.363541000 | 1.593893000  | 0.955254000  |
| C | -5.060571000 | 2.253424000  | 2.582400000  |
| C | -4.690300000 | 3.369595000  | 3.355117000  |
| H | -4.017129000 | 3.260147000  | 4.216468000  |
| C | -5.197419000 | 4.631779000  | 3.033966000  |
| H | -4.912236000 | 5.515587000  | 3.624454000  |
| C | -6.080429000 | 4.760578000  | 1.954769000  |
| H | -6.467179000 | 5.748098000  | 1.650720000  |
| C | -5.972801000 | 2.248543000  | -1.882765000 |
| H | -6.326994000 | 1.455848000  | -1.208931000 |

|   |              |              |              |
|---|--------------|--------------|--------------|
| C | -5.037028000 | 1.958891000  | -2.900344000 |
| C | -4.682112000 | 2.993995000  | -3.785736000 |
| H | -4.007362000 | 2.804782000  | -4.632063000 |
| C | -5.204098000 | 4.276349000  | -3.596036000 |
| H | -4.929598000 | 5.097639000  | -4.275073000 |
| C | -6.087269000 | 4.504816000  | -2.533853000 |
| H | -6.484826000 | 5.514476000  | -2.330963000 |
| C | 5.797703000  | -5.950981000 | 1.309484000  |
| H | 6.220880000  | -6.883604000 | 0.894799000  |
| C | 4.682062000  | -5.971154000 | 2.154865000  |
| H | 4.228327000  | -6.929393000 | 2.448350000  |
| C | 4.159803000  | -4.763611000 | 2.626248000  |
| H | 3.294733000  | -4.779452000 | 3.302688000  |
| C | 4.750844000  | -3.545166000 | 2.242501000  |
| C | 5.901068000  | -3.603796000 | 1.421244000  |
| H | 6.437954000  | -2.682421000 | 1.145972000  |
| C | 7.076371000  | -5.277037000 | -2.975548000 |
| H | 7.633275000  | -6.220178000 | -2.851203000 |
| C | 6.429576000  | -4.985432000 | -4.183965000 |
| H | 6.522899000  | -5.669845000 | -5.042457000 |
| C | 5.660470000  | -3.823186000 | -4.283178000 |
| H | 5.157642000  | -3.581751000 | -5.230443000 |
| C | 5.541262000  | -2.975609000 | -3.166378000 |
| C | 6.282430000  | -3.291430000 | -2.007074000 |
| H | 6.279709000  | -2.613677000 | -1.142703000 |
| C | 6.211159000  | 1.503240000  | 1.875191000  |
| H | 6.223374000  | 0.820465000  | 1.014685000  |
| C | 5.419351000  | 1.214682000  | 3.006690000  |
| C | 5.502153000  | 2.076282000  | 4.116042000  |
| H | 4.949773000  | 1.857650000  | 5.040607000  |
| C | 6.305359000  | 3.217004000  | 4.040713000  |
| H | 6.378132000  | 3.907931000  | 4.894918000  |
| C | 7.018148000  | 3.475724000  | 2.862134000  |
| H | 7.615392000  | 4.396379000  | 2.756318000  |
| C | 5.899924000  | 1.831433000  | -1.530962000 |
| H | 6.583631000  | 0.967869000  | -1.483901000 |

|   |              |              |              |
|---|--------------|--------------|--------------|
| C | 4.634614000  | 1.715609000  | -2.150357000 |
| C | 3.835667000  | 2.873680000  | -2.219858000 |
| H | 2.850036000  | 2.844783000  | -2.703957000 |
| C | 4.293171000  | 4.076001000  | -1.676261000 |
| H | 3.677384000  | 4.989441000  | -1.732879000 |
| C | 5.547483000  | 4.110538000  | -1.055254000 |
| H | 5.939059000  | 5.037340000  | -0.600577000 |
| C | -4.799504000 | -1.400073000 | 3.005865000  |
| C | -3.510023000 | -1.578856000 | 3.546776000  |
| H | -3.143403000 | -2.576685000 | 3.804559000  |
| C | -2.682215000 | -0.463900000 | 3.755893000  |
| C | -3.179876000 | 0.802594000  | 3.412403000  |
| H | -2.558581000 | 1.686271000  | 3.575923000  |
| C | -4.481842000 | 0.916169000  | 2.882133000  |
| C | -1.357532000 | -0.627683000 | 4.414542000  |
| C | -0.148089000 | -0.669610000 | 3.701524000  |
| H | -0.151191000 | -0.551207000 | 2.618588000  |
| C | 1.061865000  | -0.862849000 | 4.386993000  |
| C | 1.060178000  | -0.993104000 | 5.786708000  |
| H | 1.996774000  | -1.141307000 | 6.331919000  |
| C | -0.143009000 | -0.935586000 | 6.493798000  |
| H | -0.140180000 | -1.032279000 | 7.587325000  |
| C | -1.350364000 | -0.758220000 | 5.813771000  |
| H | -2.285137000 | -0.718931000 | 6.380440000  |
| C | 4.179016000  | -2.250440000 | 2.703464000  |
| C | 2.878412000  | -2.177573000 | 3.244177000  |
| H | 2.252630000  | -3.069052000 | 3.324170000  |
| C | 2.382554000  | -0.946412000 | 3.704812000  |
| C | 3.208280000  | 0.183502000  | 3.598162000  |
| H | 2.847395000  | 1.152467000  | 3.951362000  |
| C | 4.502258000  | 0.043693000  | 3.055607000  |
| C | -4.711564000 | -1.716804000 | -2.995611000 |
| C | -3.419247000 | -1.918741000 | -3.523254000 |
| H | -3.036651000 | -2.925615000 | -3.708607000 |
| C | -2.615377000 | -0.810043000 | -3.832627000 |
| C | -3.129010000 | 0.472090000  | -3.581971000 |



|   |               |              |              |
|---|---------------|--------------|--------------|
| H | -2.518214000  | 1.350109000  | -3.804697000 |
| C | -4.435538000  | 0.608204000  | -3.068724000 |
| C | -1.299977000  | -0.987796000 | -4.504507000 |
| C | -0.077159000  | -0.876296000 | -3.826418000 |
| H | -0.065902000  | -0.673731000 | -2.749258000 |
| C | 1.132485000   | -1.023032000 | -4.524760000 |
| C | 1.112339000   | -1.290081000 | -5.904326000 |
| H | 2.046260000   | -1.396071000 | -6.463571000 |
| C | -0.107048000  | -1.406396000 | -6.576900000 |
| H | -0.118787000  | -1.610608000 | -7.655621000 |
| C | -1.310987000  | -1.258523000 | -5.884096000 |
| H | -2.257129000  | -1.346936000 | -6.425635000 |
| C | 4.607800000   | -1.816980000 | -3.218535000 |
| C | 3.343484000   | -1.977730000 | -3.822068000 |
| H | 3.045776000   | -2.934735000 | -4.257242000 |
| C | 2.452696000   | -0.892945000 | -3.855871000 |
| C | 2.869175000   | 0.323587000  | -3.291860000 |
| H | 2.195937000   | 1.183716000  | -3.319486000 |
| C | 4.153054000   | 0.426890000  | -2.718355000 |
| C | -11.623068000 | -4.256061000 | 0.685192000  |
| H | -11.910520000 | -3.201113000 | 0.452942000  |
| H | -12.506572000 | -4.679405000 | 1.239066000  |
| C | -11.388305000 | -5.066766000 | -0.592787000 |
| H | -11.089884000 | -6.122349000 | -0.360169000 |
| H | -12.353577000 | -5.165014000 | -1.161617000 |
| C | -10.540695000 | 4.955974000  | 0.347845000  |
| H | -11.295980000 | 5.616825000  | 0.856997000  |
| H | -11.049776000 | 3.965869000  | 0.247140000  |
| C | -10.189246000 | 5.546526000  | -1.021033000 |
| H | -11.133282000 | 5.780149000  | -1.585824000 |
| H | -9.669161000  | 6.534603000  | -0.919894000 |
| C | 10.336451000  | -6.472317000 | 0.805393000  |
| H | 9.981343000   | -7.461114000 | 0.413487000  |
| H | 11.149612000  | -6.734695000 | 1.536598000  |
| C | 10.910457000  | -5.599032000 | -0.314116000 |
| H | 11.249558000  | -4.606874000 | 0.073909000  |

|   |              |              |              |
|---|--------------|--------------|--------------|
| H | 11.840419000 | -6.081340000 | -0.725246000 |
| C | 10.604191000 | 4.492609000  | 0.354524000  |
| H | 10.139031000 | 5.505940000  | 0.471381000  |
| H | 11.674386000 | 4.633085000  | 0.670340000  |
| C | 10.555553000 | 4.019064000  | -1.101458000 |
| H | 11.018533000 | 3.007938000  | -1.217711000 |
| H | 11.188867000 | 4.698330000  | -1.736730000 |
| C | -6.626036000 | -2.661352000 | 1.767245000  |
| H | -6.746329000 | -1.828461000 | 1.061146000  |
| C | 0.002512000  | 2.671519000  | -1.647634000 |
| C | 0.061554000  | 3.734515000  | -0.724838000 |
| C | -0.502896000 | 3.549470000  | 0.551529000  |
| C | -1.085243000 | 2.332379000  | 0.903893000  |
| C | -1.115567000 | 1.265585000  | -0.010886000 |
| C | -0.569116000 | 1.452357000  | -1.289170000 |
| H | 0.397835000  | 2.807319000  | -2.653135000 |
| H | -0.478099000 | 4.370396000  | 1.272867000  |
| H | -1.504479000 | 2.205778000  | 1.901169000  |
| H | -0.587264000 | 0.624977000  | -2.004607000 |
| C | 0.674485000  | 4.996985000  | -1.145065000 |
| H | 0.469773000  | 5.256234000  | -2.192935000 |
| C | 1.421321000  | 5.842488000  | -0.404058000 |
| C | 1.943528000  | 7.100907000  | -0.989156000 |
| C | 3.231207000  | 7.557814000  | -0.651894000 |
| C | 1.150949000  | 7.862848000  | -1.864157000 |
| C | 3.715819000  | 8.751245000  | -1.189448000 |
| H | 3.840195000  | 7.000096000  | 0.054509000  |
| C | 1.640966000  | 9.058353000  | -2.398235000 |
| H | 0.141684000  | 7.541035000  | -2.116106000 |
| C | 2.923094000  | 9.504429000  | -2.064328000 |
| H | 4.706821000  | 9.117267000  | -0.915221000 |
| H | 1.017910000  | 9.654735000  | -3.071551000 |
| H | 3.300724000  | 10.447193000 | -2.475596000 |
| C | 1.789118000  | 5.601076000  | 1.013137000  |
| C | 1.528297000  | 6.593457000  | 1.973552000  |
| C | 2.414337000  | 4.405517000  | 1.401176000  |

|   |              |              |              |
|---|--------------|--------------|--------------|
| C | 1.879945000  | 6.384677000  | 3.309010000  |
| H | 1.061636000  | 7.536964000  | 1.672738000  |
| C | 2.765705000  | 4.203728000  | 2.739060000  |
| H | 2.609166000  | 3.634631000  | 0.661272000  |
| C | 2.497947000  | 5.189638000  | 3.694063000  |
| H | 1.679872000  | 7.162672000  | 4.053353000  |
| H | 3.242725000  | 3.275813000  | 3.039275000  |
| H | 2.767891000  | 5.036980000  | 4.739786000  |
| C | -1.740352000 | -0.013817000 | 0.361847000  |
| H | -2.779950000 | 0.084039000  | 0.693855000  |
| C | -1.160678000 | -1.227777000 | 0.334093000  |
| C | 0.246674000  | -1.505860000 | -0.035032000 |
| C | 1.286032000  | -0.650170000 | 0.361922000  |
| C | 0.556512000  | -2.688245000 | -0.733703000 |
| C | 2.614773000  | -0.994016000 | 0.101590000  |
| H | 1.060737000  | 0.284372000  | 0.879359000  |
| C | 1.885586000  | -3.034980000 | -0.976155000 |
| H | -0.244336000 | -3.348689000 | -1.072998000 |
| C | 2.917623000  | -2.197817000 | -0.539363000 |
| H | 3.415315000  | -0.324264000 | 0.409234000  |
| H | 2.114126000  | -3.961992000 | -1.502194000 |
| H | 3.953670000  | -2.481553000 | -0.701204000 |
| C | -1.924950000 | -2.443550000 | 0.726083000  |
| C | -1.429947000 | -3.287104000 | 1.736306000  |
| C | -3.109810000 | -2.784336000 | 0.058601000  |
| C | -2.104531000 | -4.466025000 | 2.058599000  |
| H | -0.511148000 | -3.024834000 | 2.262097000  |
| C | -3.777247000 | -3.970467000 | 0.381009000  |
| H | -3.493980000 | -2.134881000 | -0.724707000 |
| C | -3.275140000 | -4.814725000 | 1.375091000  |
| H | -1.710706000 | -5.128469000 | 2.833342000  |
| H | -4.679676000 | -4.248434000 | -0.158258000 |
| H | -3.777755000 | -5.754658000 | 1.608125000  |
